# Supplementary material for: Reaction of silylallenes with triplet molecular oxygen
Source: Royal Society of Chemistry journal article supplement (doi:10.1039/c8qo00390d), 2018-01-01
Supplement: c8qo00390d1.pdf [file c8qo00390d1.pdf]

Supporting information

For

## Reaction of Silylallenes with Triplet Molecular Oxygen

Yunazhi Xia,<sup>‡</sup> Nam-Kyu Lee,<sup>†</sup> Venkata R. Sabbasani,<sup>†</sup> Saswata Gupta,<sup>†</sup> and Daesung Lee\*<sup>†</sup>

<sup>†</sup>Department of Chemistry University of Illinois at Chicago

<sup>‡</sup>College of Chemistry and Materials Engineering, Wenzhou University

[dsunglee@uic.edu](mailto:dsunglee@uic.edu)

### Contents

|                                                            |         |
|------------------------------------------------------------|---------|
| General Information                                        | S1      |
| Experimental Procedures and Characterization Data          | S2–S6   |
| <sup>1</sup> H, and <sup>13</sup> C Spectral Data          | S7–S27  |
| Monitoring the Reaction of <b>3g</b> by <sup>1</sup> H NMR | S28–S30 |
| Computational Details and Results                          | S31–S38 |

### General Information

Reactions were carried out in oven or flame-dried glassware unless otherwise noted. Compounds were purchased from Aldrich or Acros or TCI America or Oakwood or GFS or Strem chemicals unless otherwise noted. Dichloromethane (DCM) were distilled over calcium hydride (CaH<sub>2</sub>) under nitrogen atmosphere. Flash chromatography was performed using silica gel 60 Å (32–63 mesh) purchased from Silicycle Inc. Analytical thin layer chromatography (TLC) was performed on 0.25 mm E. Merck precoated silica gel 60 (particle size 0.040–0.063 mm). Yields refer to chromatographically and spectroscopically pure compounds unless otherwise stated. <sup>1</sup>H NMR and <sup>13</sup>C NMR spectra were recorded on a Bruker DRX-500 spectrometer. Multiplicities are indicated by s (singlet), d (doublet), t (triplet), q (quartet), qn (quintet), sext (sextet), m (multiplet), b (broad), and app (apparent). <sup>1</sup>H NMR signals that fall within a ca. 0.3 ppm range are generally reported as a multiplet, with a single chemical shift value corresponding to the center of the peak. Coupling constants, *J*, are reported in Hz (Hertz). Electrospray ionization (ESI) mass spectra were recorded on a Waters Micromass Q-ToF Ultima in the University of Illinois at Urbana-Champaign. Electron impact (EI) mass spectra and Chemical Ionization (CI) mass spectra were obtained using a Micromass 70-VSE in the University of Illinois at Urbana-Champaign.

## Experimental Details and Characterization Data

### General procedure for preparation of silyllallenes

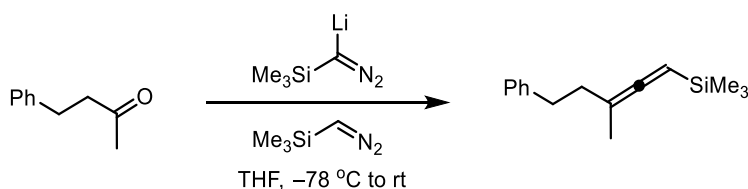

Silyllallenes **1a**, **1b**, **1d–1f**, and **3a–3j** were prepared by published three component coupling involving ketones, lithiated trimethylsilyl diazomethane and trimethylsilyl diazomethane.<sup>1–4</sup> The characterization data of compounds **1a**, **1b**, **1d**, **1f**, **3a**, **3b** and **3d–3j** were found in reference 1–4. Other allenes **1c**, **1g**, **1h**, and **3e'** were synthesized according to reported procedures in reference 2–4. The characterization data of compounds **1g**, **1h**, and **3e'** were found in reference 2 and 4.

 **1b**: <sup>1</sup>H NMR (501 MHz, CDCl<sub>3</sub>)  $\delta$  7.43 (d,  $J = 7.4$  Hz, 2H), 7.38 (t,  $J = 7.7$  Hz, 2H), 7.22 (t,  $J = 7.2$  Hz, 1H), 5.40 (dd,  $J = 7.0, 3.4$  Hz, 1H), 2.14 (d,  $J = 3.4$  Hz, 3H), 0.24 (s, 9H); <sup>13</sup>C NMR (126 MHz, CDCl<sub>3</sub>)  $\delta$  210.5, 137.7, 128.4, 125.7, 125.1, 93.7, 85.5, 16.1, -0.5.

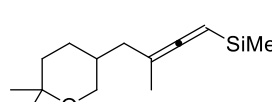 **1e**: <sup>1</sup>H NMR (501 MHz, CDCl<sub>3</sub>)  $\delta$  4.81 (m, 1H), 3.68 (m, 1H) 3.29 (m, 1H) 1.86-1.62 (m), 1.53-1.41 (m), 1.33-1.26 (m), 1.20 (s, 3H), 1.18 (s, 3H), 0.06 (s, 9H); <sup>13</sup>C NMR (126 MHz, CDCl<sub>3</sub>)  $\delta$  209.0, 209.0, 89.2, 81.9, 81.8, 71.1, 66.8, 66.7, 36.5, 36.4, 36.1, 35.9, 33.9, 33.9, 31.6, 30.5, 30.2, 22.7, 22.5, 22.3, 18.2, 18.1, 14.1, -0.7.; HRMS (ESI) calcd for C<sub>49</sub>H<sub>50</sub>NO<sub>2</sub>SSi<sub>2</sub>[M+H]<sup>+</sup>: 772.3101, found 772.3089.

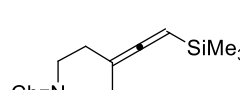 **3c**: <sup>1</sup>H NMR (501 MHz, CDCl<sub>3</sub>)  $\delta$  7.37-7.30 (m, 5H), 5.14 (s, 2H), 4.92-4.90 (m, 1H), 3.68-3.66 (m, 2H), 3.42-3.37 (m, 2H), 0.09 (s, 9H); <sup>13</sup>C NMR (126 MHz, CDCl<sub>3</sub>)  $\delta$  205.7, 155.2, 136.9, 128.5, 127.9, 90.8, 82.7, 67.1, 45.3, 30.0, 30.0, -0.8; HRMS (ESI) calcd for C<sub>18</sub>H<sub>25</sub>NO<sub>2</sub>SiNa [M+Na]<sup>+</sup>: 338.1552, found 338.1552.

### General procedure for autooxidation of silyllallenes

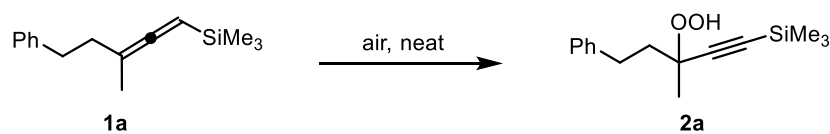

Silyllallene **1a** (23 mg, 0.1 mmol) under air was stirred for 48 h (monitored by TLC and  $^1\text{H}$  NMR). After the starting material disappearance, the crude material was purified by silica gel column chromatography (Hexanes/EtOAc = 98 : 2) to provide peroxide **2a** (26.9 mg, > 98 % yield).

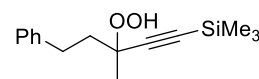 **2a:**  $^1\text{H}$  NMR (501 MHz,  $\text{CDCl}_3$ )  $\delta$  7.93 (br, HOO-, 1H), 7.31 (t,  $J = 7.5$  Hz, 2H), 2.81 (t,  $J = 8.8$  Hz, 2H), 2.16-2.01 (m, 2H), 1.56 (s, 3H), 0.24 (s, 9H);  $^{13}\text{C}$  NMR (126 MHz,  $\text{CDCl}_3$ )  $\delta$  141.8, 128.5, 128.4, 126.0, 105.3, 90.7, 80.9, 40.8, 30.7, 24.5, 0.0; HRMS (ESI) calcd for  $\text{C}_{15}\text{H}_{22}\text{O}_2\text{SiNa}[\text{M}+\text{Na}]^+$ : 285.1287, found 285.1283.

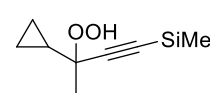 **2b:**  $^1\text{H}$  NMR (501 MHz,  $\text{CDCl}_3$ )  $\delta$  7.75 (s, HOO-, 1H), 1.04 (m, 1H), 0.88 (m, 1H), 0.07 (m, 1H), 0.41 (m, 1H), 0.17 (s, 9H);  $^{13}\text{C}$  NMR (126 MHz,  $\text{CDCl}_3$ )  $\delta$  102.2, 91.0, 83.8, 29.7, 25.4, 17.2, 2.9, 1.5, -0.01; HRMS (ESI) calcd for  $\text{C}_{10}\text{H}_{18}\text{O}_2\text{SiNa} [\text{M}+\text{Na}]^+$ : 221.0974, found 221.0979.

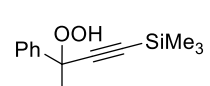 **2c:**  $^1\text{H}$  NMR (501 MHz,  $\text{CDCl}_3$ )  $\delta$  8.03 (br, HOO-, 1H), 7.66 (d,  $J = 7.3$  Hz, 2H), 7.41 (t,  $J = 7.4$  Hz, 2H), 7.36 (t,  $J = 7.1$ , 1H), 1.76 (s, 3H), 0.28 (s, 9H);  $^{13}\text{C}$  NMR (126 MHz,  $\text{CDCl}_3$ )  $\delta$  141.0, 128.5, 128.4, 128.3, 127.7, 126.0, 125.0, 104.4, 92.5, 83.0, 33.4, 28.7, 0.0; HRMS (ESI) calcd for  $\text{C}_{13}\text{H}_{18}\text{O}_2\text{SiNa} [\text{M}+\text{Na}]^+$ : 257.0974, found 257.0979.

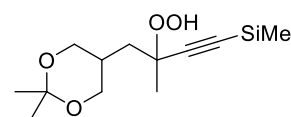 **2d:**  $^1\text{H}$  NMR (501 MHz,  $\text{CDCl}_3$ )  $\delta$  8.19 (s, HOO-, 1H), 3.99 (m, 2H), 3.70-3.62 (m, 2H), 2.10 (m, 1H), 1.78-1.64 (m, 2H), 1.51 (s, 3H), 1.42 (s, 3H), 1.41 (s, 3H), 0.18 (s, 9H);  $^{13}\text{C}$  NMR (126 MHz,  $\text{CDCl}_3$ )  $\delta$  104.9, 97.9, 90.8, 80.3, 65.1, 65.1, 37.5, 31.1, 25.9, 25.1, 22.1, -0.1; HRMS (ESI) calcd for  $\text{C}_{14}\text{H}_{27}\text{O}_4\text{Si}[\text{M}+\text{H}]^+$ : 287.1679, found 287.1688.

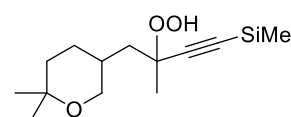 **2e:** (mixture of two diastereomers)  $^1\text{H}$  NMR (501 MHz,  $\text{CDCl}_3$ )  $\delta$  8.26 (s, HOO-, 1H), 8.15 (s, HOO-, 1H), 3.79-3.73 (m, 1H), 3.37-3.33 (m, 1H), 1.85-1.79 (m, 2H), 1.69-1.35 (m, 8H), 1.20 (s, 3H), 1.17 (s, 3H), 0.17 (s, 9H);  $^{13}\text{C}$  NMR (126 MHz,  $\text{CDCl}_3$ )  $\delta$  105.7, 105.5, 90.4, 90.2, 80.6, 80.6, 71.1, 66.7, 41.0, 40.9, 35.7, 32.1, 32.1, 29.7, 27.6, 27.5, 25.2, 25.0, 22.9, 22.9, -0.1; HRMS (ESI) calcd for  $\text{C}_{17}\text{H}_{27}\text{O}_3\text{Si}[\text{M}-\text{H}]^+$ : 307.1729, found 307.1719.

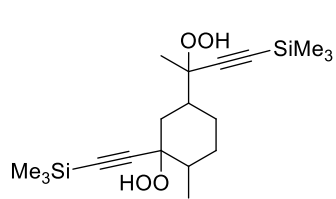

**2f:** (mixture of four diastereomers)  $^1\text{H NMR}$  (501 MHz,  $\text{CDCl}_3$ )  $\delta$  7.78 (s, HOO-, 1H), 7.73 (s, HOO-, 1H), 7.72 (s, HOO-, 1H), 7.70 (s, HOO-, 1H), 7.68 (s, HOO-, 1H), 7.67 (s, HOO-, 1H), 7.62 (s, HOO-, 1H), 2.75-2.54 (m), 2.29-1.56 (m), 1.48 (s, 3H), 1.40 (s, 3H), 1.41 (s, 3H), 1.43-1.13 (m), 1.08-1.06 (m), 0.99-0.97 (m), 0.19 (s), 0.18 (s)  $^{13}\text{C NMR}$  (126 MHz,  $\text{CDCl}_3$ )  $\delta$  105.8, 105.0, 104.6, 104.5, 104.4, 102.5, 94.1, 94.0, 91.6, 91.5, 91.4, 91.0, 90.0, 86.2, 86.2, 83.5, 83.4, 83.4, 83.2, 82.2, 82.2, 42.6, 42.4, 40.8, 40.7, 38.9, 38.6, 38.3, 37.2, 37.0, 35.5, 34.9, 31.8, 29.0, 28.9, 27.1, 26.7, 26.7, 26.2, 22.3, 22.1, 21.5, 21.0, 16.0, 0.2, 0.0, -0.2; **HRMS** (ESI) calcd for  $\text{C}_{19}\text{H}_{35}\text{O}_4\text{Si}_2[\text{M}+\text{H}]^+$ : 383.2074, found 383.2070.

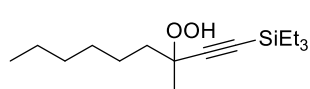

**2g:**  $^1\text{H NMR}$  (501 MHz,  $\text{CDCl}_3$ )  $\delta$  7.71 (s, 1H), 1.79-1.73 (m, 1H), 1.69-1.62 (m, 1H), 1.52-1.41 (m, 5H), 1.35-1.25 (m, 6H), 0.99 (t,  $J = 7.9$ , 7.9 Hz, 9H), 0.88 (t,  $J = 6.8$ , 6.8 Hz, 3H), 0.61 (q,  $J = 7.9$ , 7.9, 7.9 Hz, 6H);  $^{13}\text{C NMR}$  (126 MHz,  $\text{CDCl}_3$ )  $\delta$  107.0, 87.5, 81.5, 38.8, 31.7, 29.4, 24.5, 24.3, 22.5, 14.1, 7.5, 4.4; **HRMS** (ESI) calcd for  $\text{C}_{18}\text{H}_{32}\text{O}_2\text{SiNa} [\text{M}+\text{Na}]^+$ : 331.2069, found 331.2066.

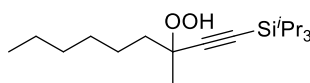

**2h:**  $^1\text{H NMR}$  (501 MHz,  $\text{CDCl}_3$ )  $\delta$  7.70 (s, 1H), 1.80-1.74 (m, 1H), 1.69-1.62 (m, 1H), 1.53-1.42 (m, 5H), 1.36-1.24 (m, 6H), 1.11-1.02 (m, 21H), 0.88 (t,  $J = 6.9$ , 6.9 Hz, 3H);  $^{13}\text{C NMR}$  (126 MHz,  $\text{CDCl}_3$ )  $\delta$  107.7, 86.5, 81.6, 38.9, 31.7, 29.4, 24.6, 24.4, 22.5, 18.6, 4.1, 11.1; **HRMS** (ESI) calcd for  $\text{C}_{19}\text{H}_{38}\text{O}_2\text{SiNa} [\text{M}+\text{Na}]^+$ : 349.2539, found 349.2533.

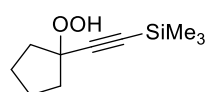

**4a:**  $^1\text{H NMR}$  (501 MHz,  $\text{CDCl}_3$ )  $\delta$  7.99 (s, HOO-, 1H) 2.16-2.11 (m, 2H), 1.92-1.88 (m, 2H), 1.73-1.71 (m, 4H), 0.18 (s, 9H);  $^{13}\text{C NMR}$  (126 MHz,  $\text{CDCl}_3$ )  $\delta$  105.8, 89.6, 87.9, 38.1, 24.1, 0.0; **HRMS** (EI) calcd for  $\text{C}_{10}\text{H}_{18}\text{O}_2\text{Si}[\text{M}]^+$ : 198.1076, found 198.1076.

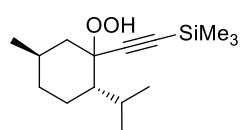

**4b:**  $^1\text{H NMR}$  (501 MHz,  $\text{CDCl}_3$ )  $\delta$  7.58 (s, HOO-, 1H), 2.34-2.32 (m, 1H), 2.11 (m, 1H), 1.73-1.67 (m, 3H), 1.43-1.16 (m, 4H), 0.95-0.90 (m, 10H), 0.18 (s, 9H);  $^{13}\text{C NMR}$  (126 MHz,  $\text{CDCl}_3$ )  $\delta$  104.4, 93.8, 84.9, 49.5, 45.6, 34.7, 30.1, 26.3, 24.3, 23.7, 22.0, 18.2, -0.1; **HRMS** (EI) calcd for  $\text{C}_{15}\text{H}_{28}\text{O}_2\text{Si} [\text{M}]^+$ : 252.1910, found 252.1890.

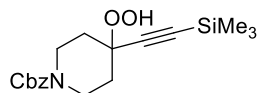

**4c:**  $^1\text{H NMR}$  (501 MHz,  $\text{CDCl}_3$ )  $\delta$  8.01 (s, HOO-, 1H), 7.38-7.26 (m, 5H), 5.13 (s, 2H), 3.81 (br, 2H), 3.40-3.35 (m, 2H), 1.96 (s, 2H), 1.81 (s, 2H) 0.19 (s, 9H);  $^{13}\text{C NMR}$  (126 MHz,  $\text{CDCl}_3$ )  $\delta$  155.1, 136.7, 128.5, 128.1, 127.9, 103.7, 92.3, 79.3, 67.3, 40.6, 34.3, -0.1; **HRMS** (ESI) calcd for  $\text{C}_{18}\text{H}_{25}\text{NO}_4\text{SiNa} [\text{M}+\text{Na}]^+$ : 307.1451, found 307.1444.

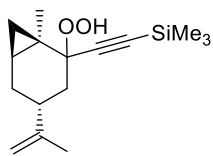

**4d:**  $^1\text{H NMR}$  (501 MHz,  $\text{CDCl}_3$ )  $\delta$  7.83 (s, HOO-), 4.69 (d,  $J = 11.2$  Hz, 2H), 2.13 (d,  $J = 14.5$  Hz, 1H), 1.95-1.80 (m, 2H), 1.68 (s, 3H), 1.64-1.59 (m, 1H), 1.39 (dd,  $J = 14.4, 12.4$  Hz, 1H), 1.28 (s, 3H), 1.08-0.98 (m, 1H), 0.85 (t,  $J = 5.6$  Hz, 1H), 0.44-0.41 (m, 1H), 0.19 (s, 9H);  $^{13}\text{C NMR}$  (126 MHz,  $\text{CDCl}_3$ )  $\delta$  148.4, 109.3, 105.5, 91.6, 83.3, 38.7, 33.1, 28.8, 26.4, 21.6, 21.0, 20.3, 13.0 -0.1; **HRMS** (ESI) calcd for  $\text{C}_{16}\text{H}_{26}\text{O}_2\text{SiNa}$   $[\text{M}+\text{Na}]^+$ : 301.1600, found 301.1597.

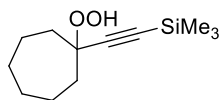

**4e:**  $^1\text{H NMR}$  (501 MHz,  $\text{CDCl}_3$ )  $\delta$  7.87 (s, HOO-, 1H), 2.03-1.98 (m, 2H), 1.88-1.84 (m, 2H), 1.67-1.53 (m, 8H), 0.17 (s, 9H);  $^{13}\text{C NMR}$  (126 MHz,  $\text{CDCl}_3$ )  $\delta$  106.8, 90.1, 85.0, 37.4, 28.7, 22.5, 0.0; **HRMS** (ESI) calcd for  $\text{C}_{12}\text{H}_{22}\text{O}_2\text{SiNa}$   $[\text{M}+\text{Na}]^+$ : 249.1287, found 249.1298.

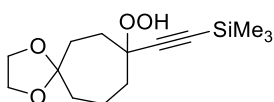

**4f:**  $^1\text{H NMR}$  (501 MHz,  $\text{CDCl}_3$ )  $\delta$ ; 7.85 (s, HOO-, 1H), 3.91 (m, 4H), 2.07-2.01 (m, 6H), 0.18 (s, 9H);  $^{13}\text{C NMR}$  (126 MHz,  $\text{CDCl}_3$ )  $\delta$  111.6, 106.3, 90.2, 84.1, 64.2, 39.4, 38.2, 31.5, 30.4, 18.1, 0.0; **HRMS** (ESI) calcd for  $\text{C}_{14}\text{H}_{24}\text{NO}_4\text{Si}$ : 307.1342, found 307.1338

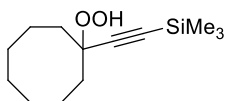

**4g:**  $^1\text{H NMR}$  (501 MHz,  $\text{CDCl}_3$ )  $\delta$  7.71 (s, HOO-, 1H), 2.00 (m, 2H), 1.90 (m, 2H), 1.48-1.47 (m, 10H), 0.18 (s, 9H);  $^{13}\text{C NMR}$  (126 MHz,  $\text{CDCl}_3$ )  $\delta$  106.2, 90.3, 84.9, 32.7, 27.9, 24.9, 22.1, 0.0; **HRMS** (ESI) calcd for  $\text{C}_{49}\text{H}_{50}\text{NO}_2\text{SSi}_2$   $[\text{M}+\text{H}]^+$ : 772.3101, found 772.3105

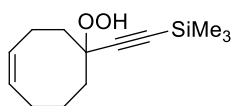

**4h:**  $^1\text{H NMR}$  (501 MHz,  $\text{CDCl}_3$ )  $\delta$  7.71 (s, HOO-, 1H), 5.80-5.75 (m, 1H), 5.57-5.51 (m, 1H), 2.49-2.31 (m, 2H), 2.22-2.15 (m, 2H), 2.03 (m, 1H), 1.84 (m, 3H), 1.68 (m, 1H), 1.56 (m, 1H), 0.21 (s, 9H);  $^{13}\text{C NMR}$  (126 MHz,  $\text{CDCl}_3$ )  $\delta$  131.1, 128.4, 104.2, 93.0, 85.9, 37.2, 31.6, 24.0, 23.8, 22.8, -0.1; **HRMS** (ESI) calcd for  $\text{C}_{13}\text{H}_{22}\text{NO}_2\text{SiNa}$   $[\text{M}+\text{Na}]^+$ : 261.1287, found 261.1294.

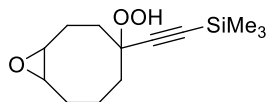

**4i:**  $^1\text{H NMR}$  (501 MHz,  $\text{CDCl}_3$ ) (mixture of diastereomers)  $\delta$  7.97 (s, HOO-, 1H), 3.08-2.92 (m, 1H), 2.92-2.87 (m, 1H), 2.30-2.00 (m, 5H), 1.94-1.41 (m, 5H), 0.18 (2s, 9H);  $^{13}\text{C NMR}$  (126 MHz,  $\text{CDCl}_3$ )  $\delta$  110.0, 105.0, 102.3, 93.8, 93.5, 85.3, 84.9, 56.9, 55.9, 55.1, 54.9, 35.2, 34.6, 34.3, 33.2, 28.3, 24.2, 23.6, 22.9, 21.9, 21.8, -0.2; **HRMS** (ESI) calcd for  $\text{C}_{13}\text{H}_{23}\text{O}_3\text{Si}_2$   $[\text{M}+\text{H}]^+$ : 255.1416, found 255.1412.

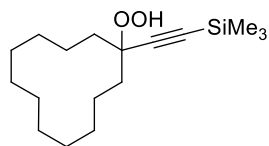

**4j**:  $^1\text{H NMR}$  (501 MHz,  $\text{CDCl}_3$ )  $\delta$  7.74 (s, HOO-, 1H), 2.17 (s, 4H), 1.90-1.84 (m, 2H), 1.66-1.60 (m, 3H), 1.51-1.49 (m, 3H), 1.35 (m, 12H);  $^{13}\text{C NMR}$  (126 MHz,  $\text{CDCl}_3$ )  $\delta$  106.1, 90.3, 84.2, 31.0, 26.0, 22.4, 22.1, 19.3, 0.0; **HRMS** (ESI) calcd for  $\text{C}_{17}\text{H}_{32}\text{O}_2\text{SiNa}[\text{M}+\text{Na}]^+$ : 319.2069, found 319.2081.

#### References:

- (1) Zheng, J.-C.; Yun, S. Y.; Sun, C.; Lee, N.-K.; Lee, D. *J. Org. Chem.* **2011**, *76*, 1086.
- (2) Sabbasani, V. R.; Lee, D. *Org. Lett.* **2013**, *15*, 3954.
- (3) Sabbasani, V. R.; Lee, D. *Org. Lett.* **2015**, *17*, 4878.
- (4) Sabasani, V. R.; Huang, G.; Xia, Y.; Lee, D. *Chem. Eur. J.* **2015**, *21*, 17210.

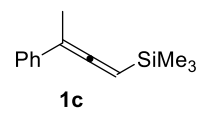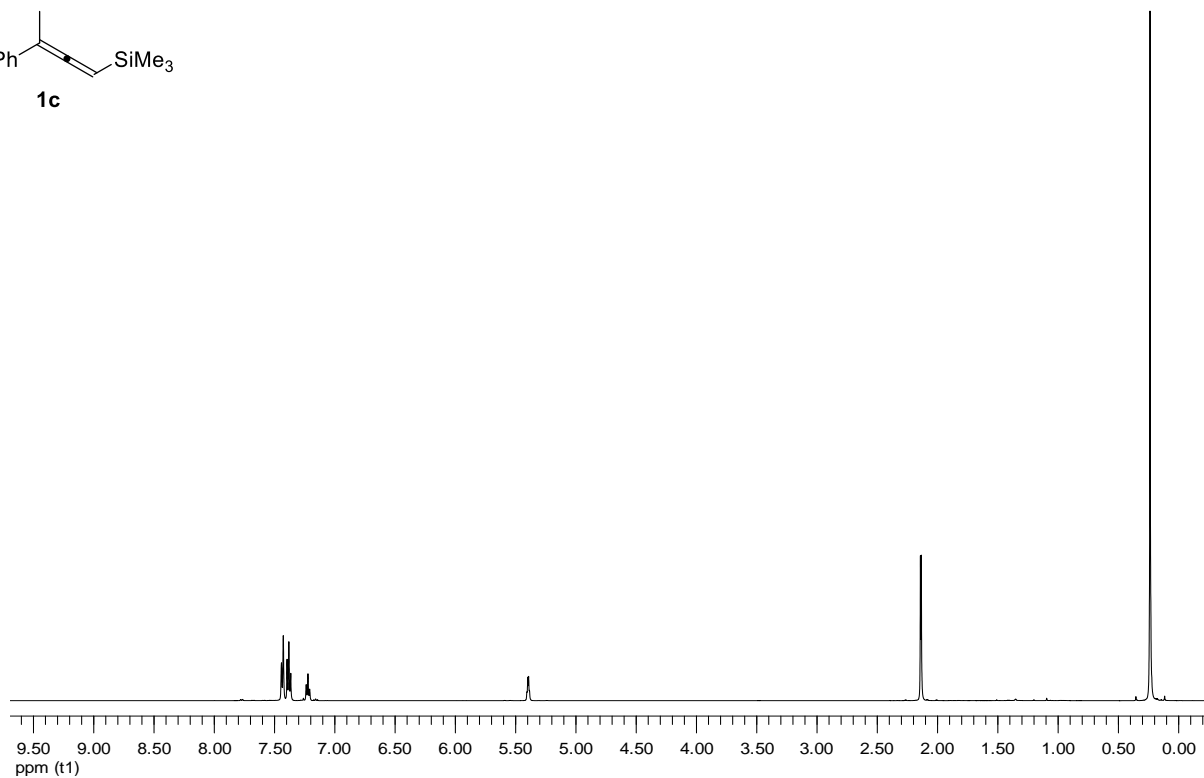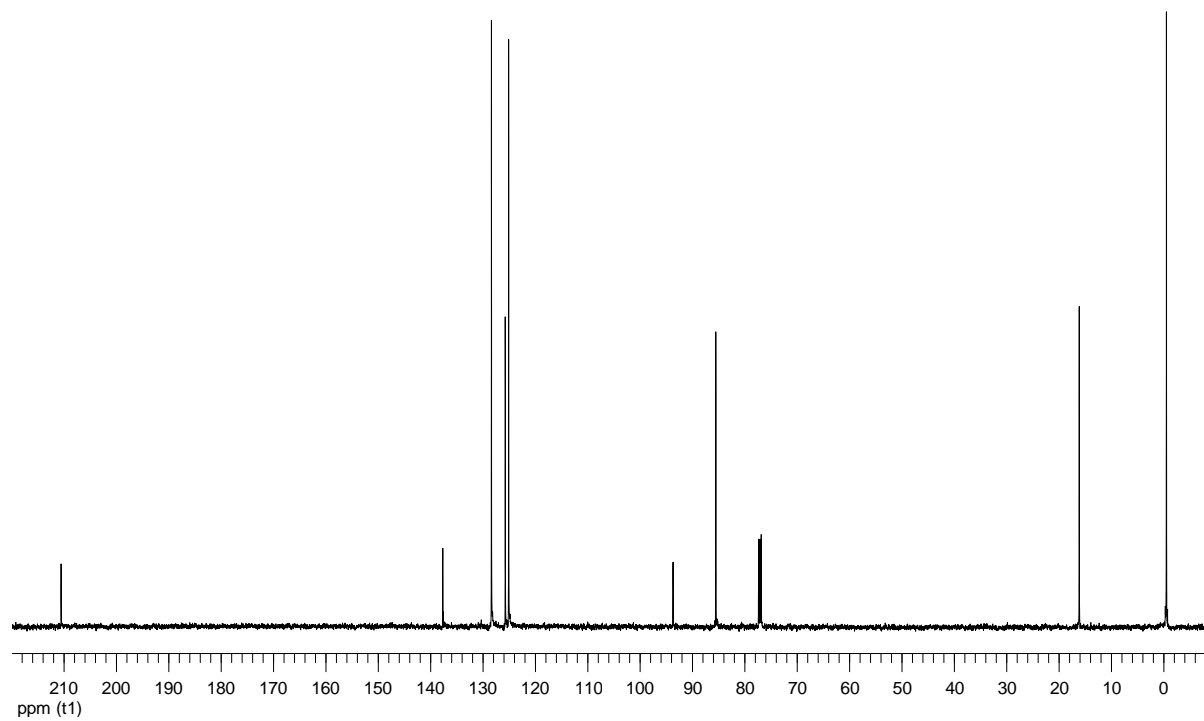

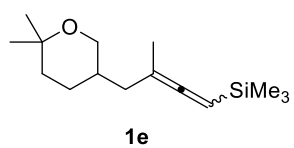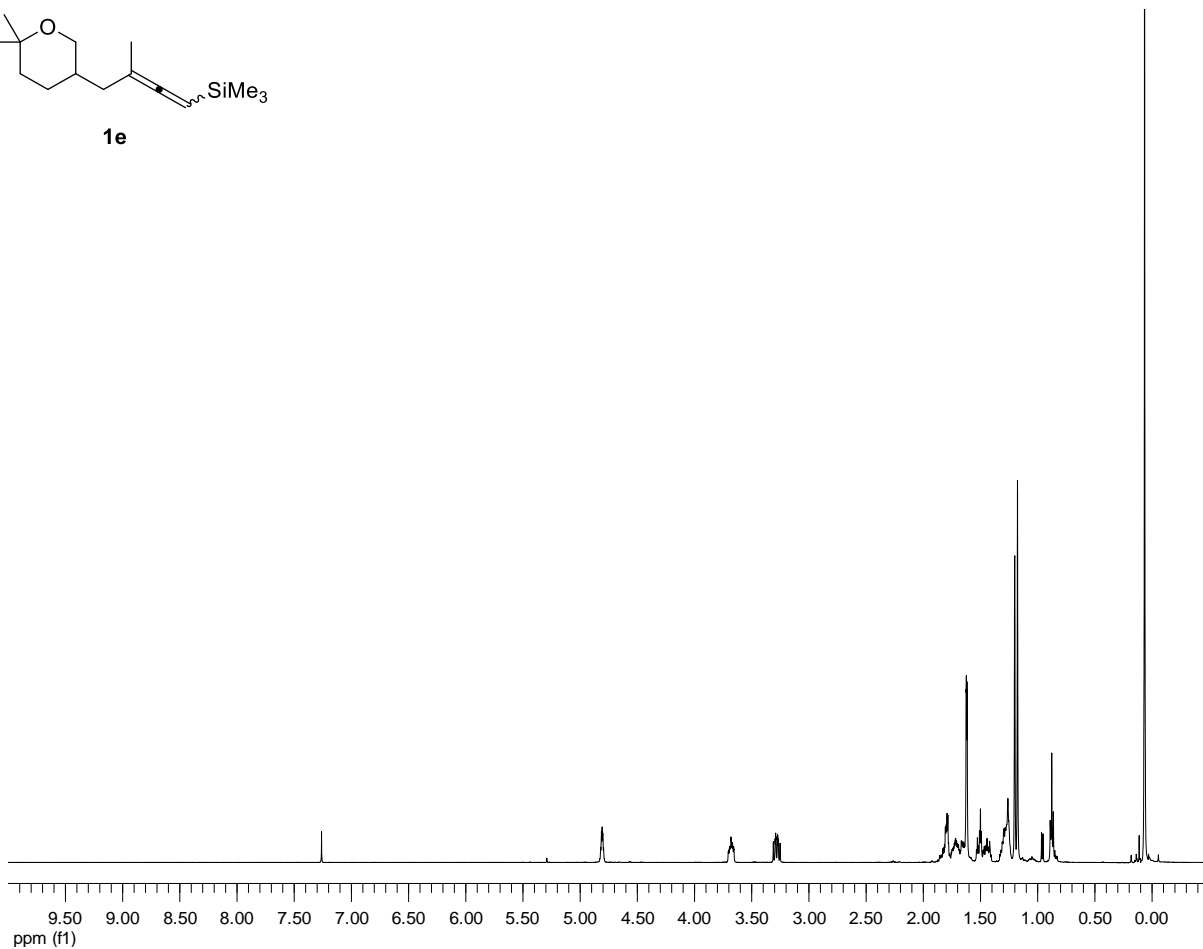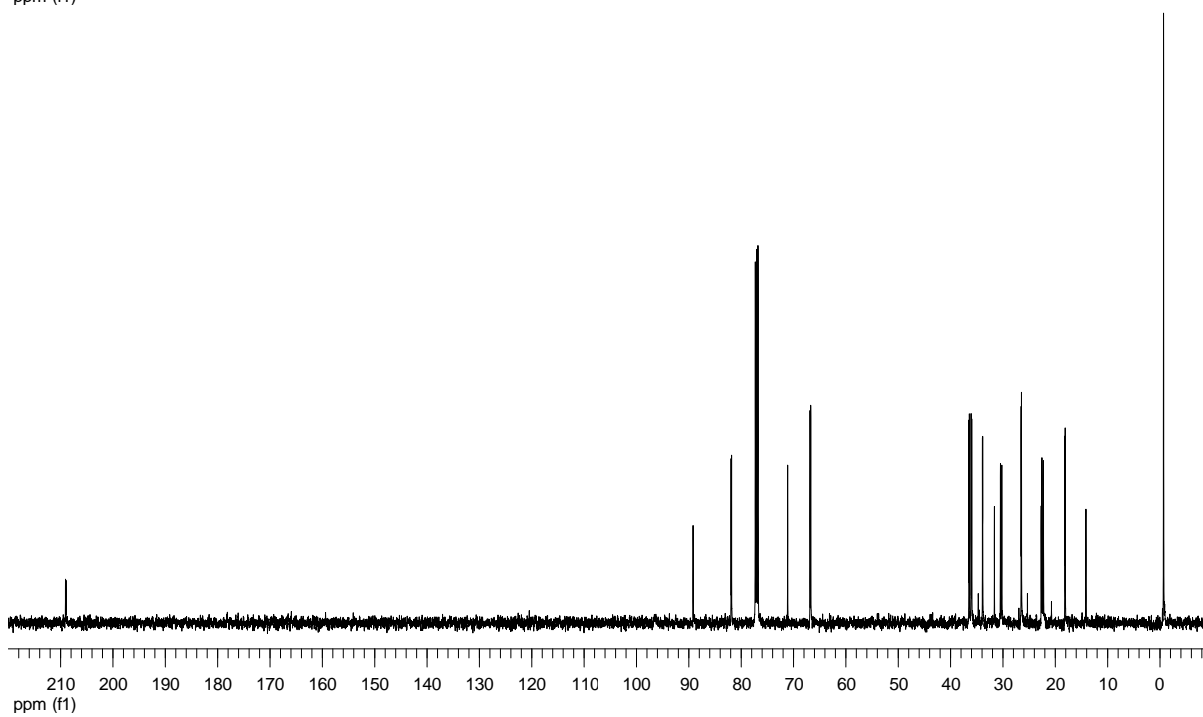



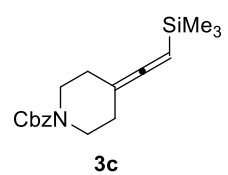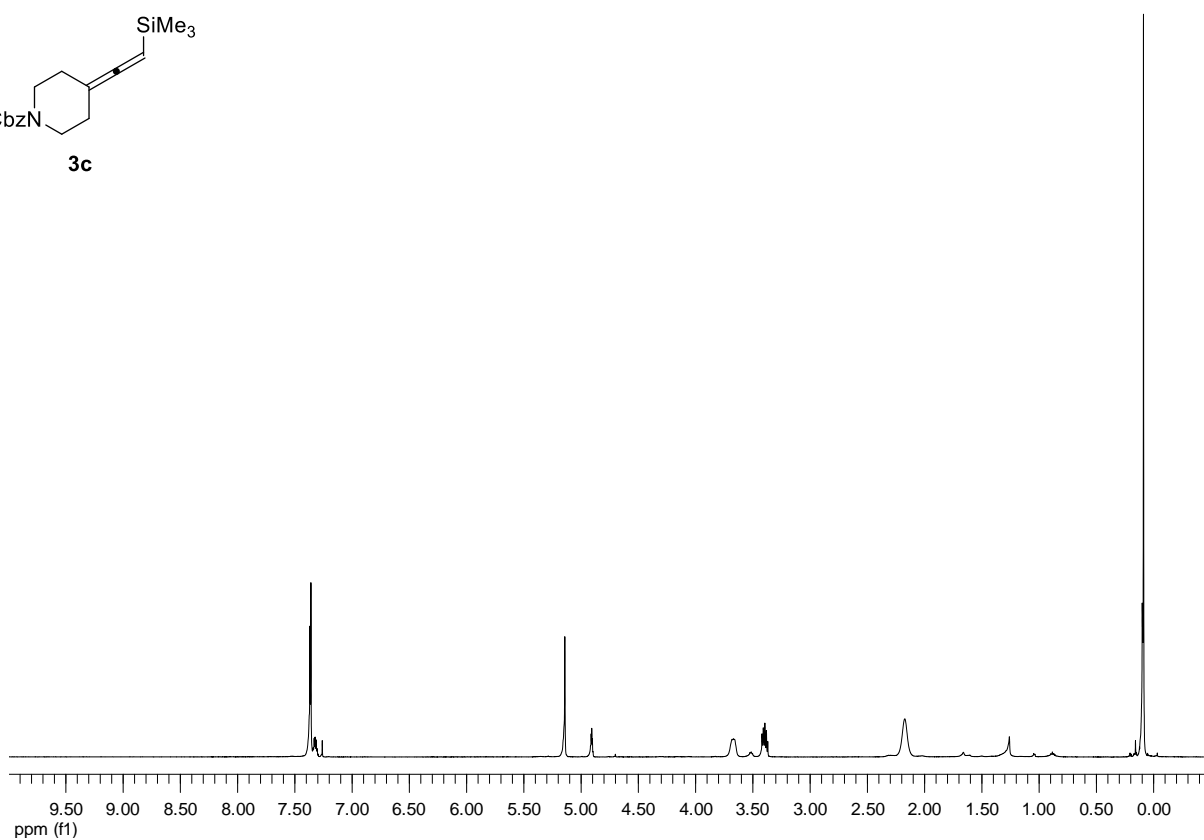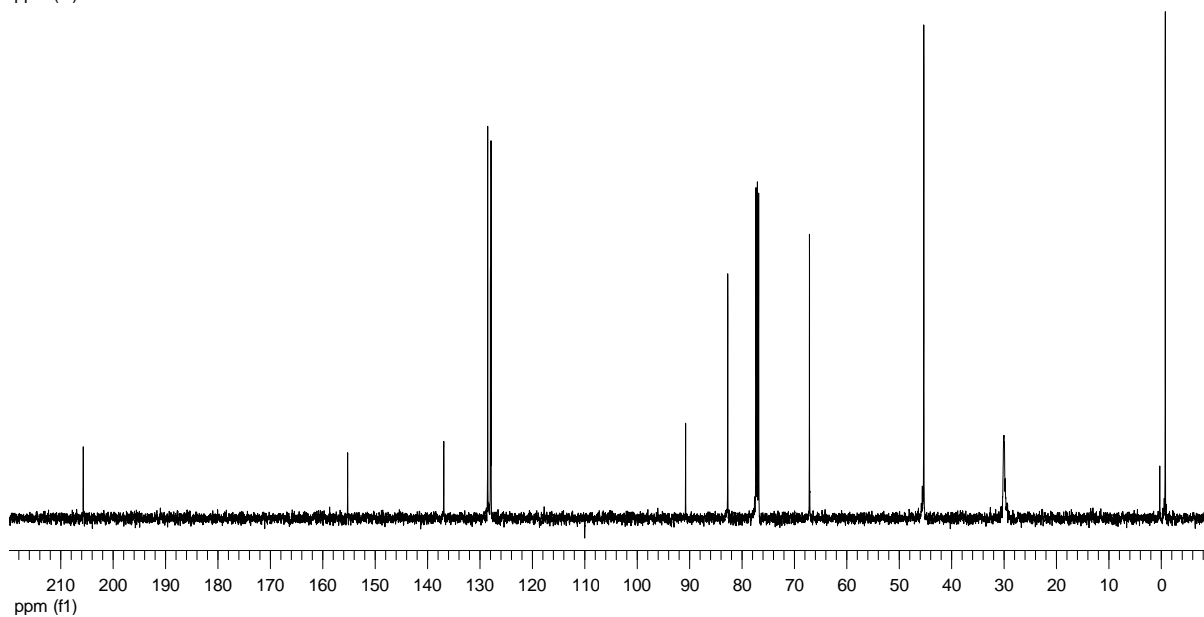

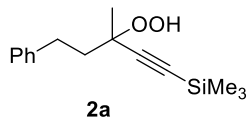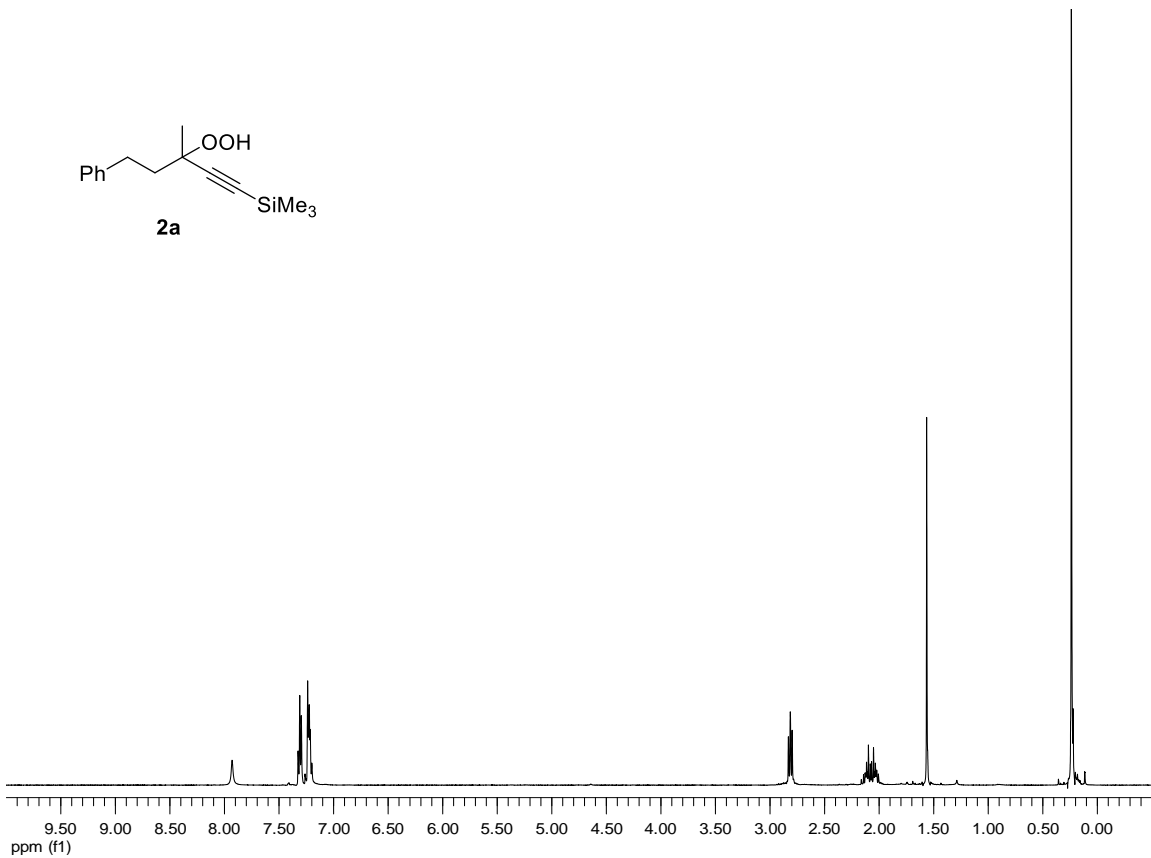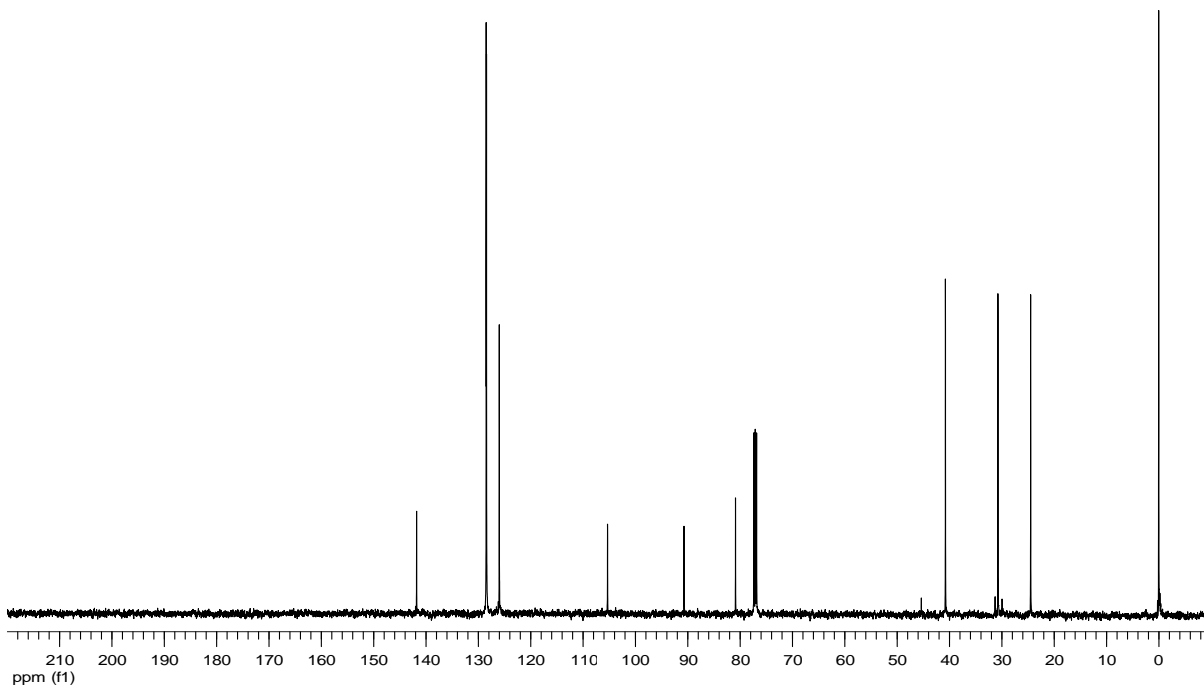

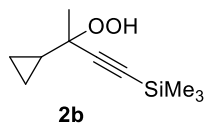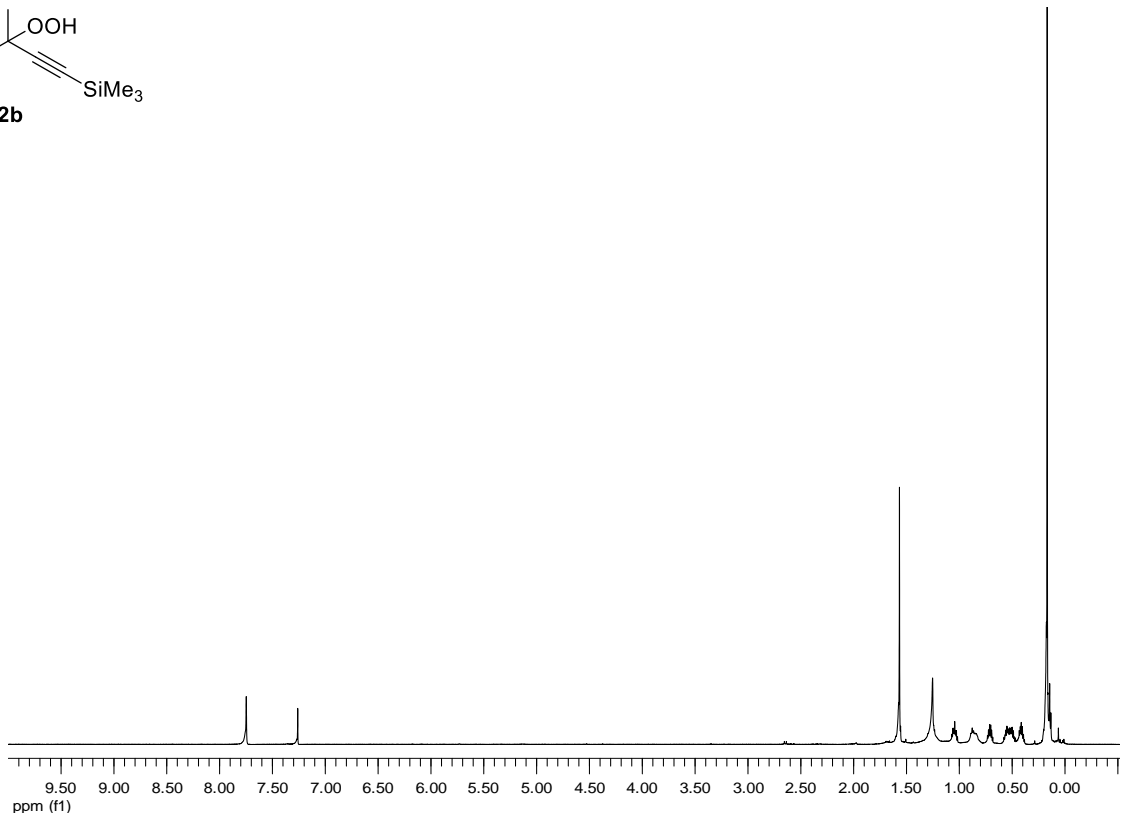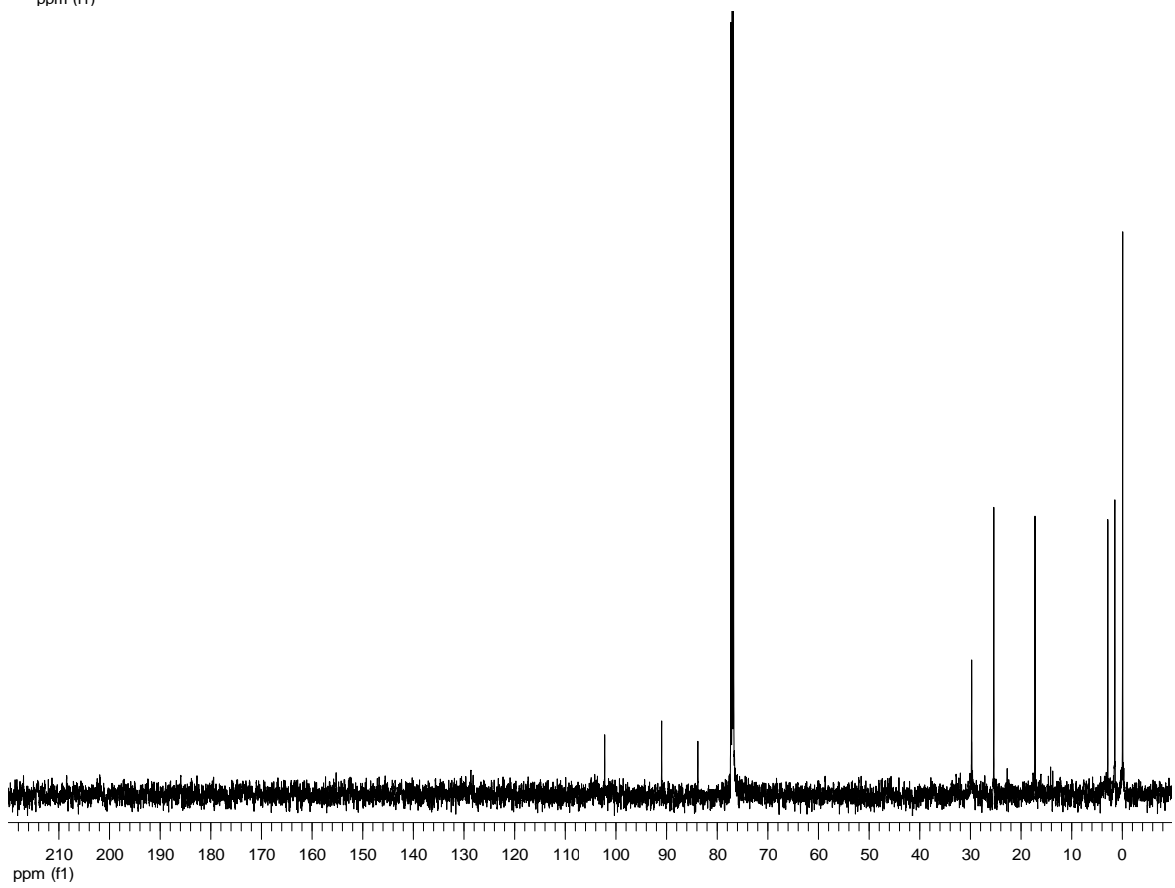

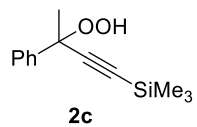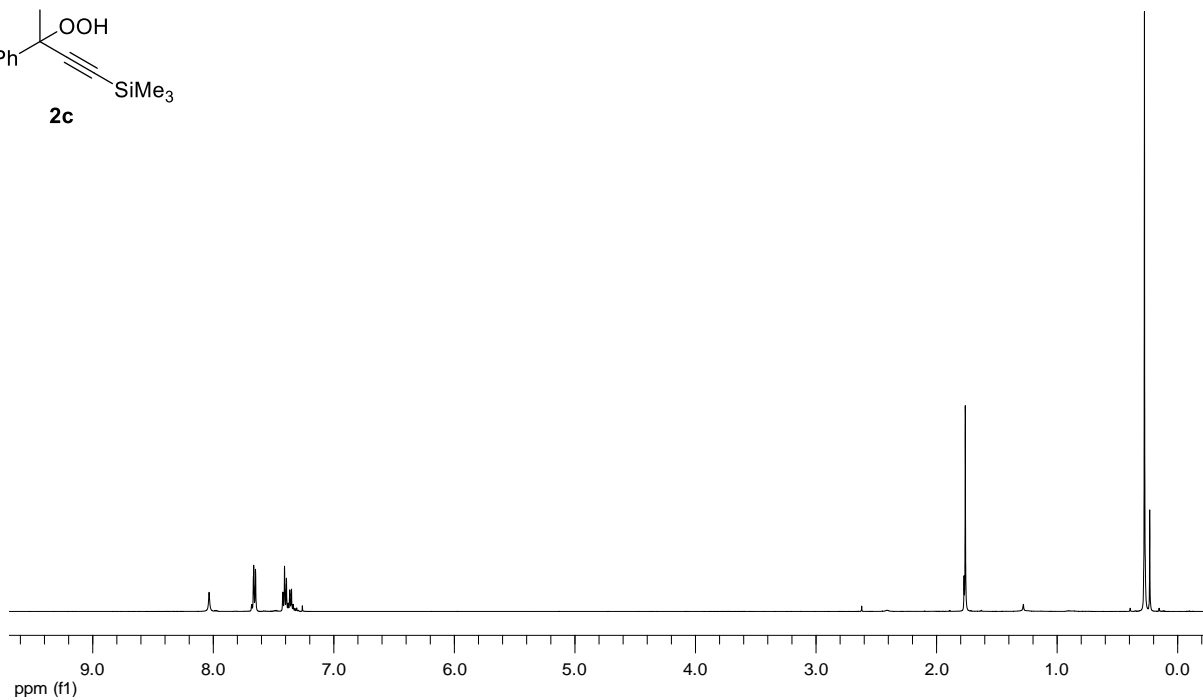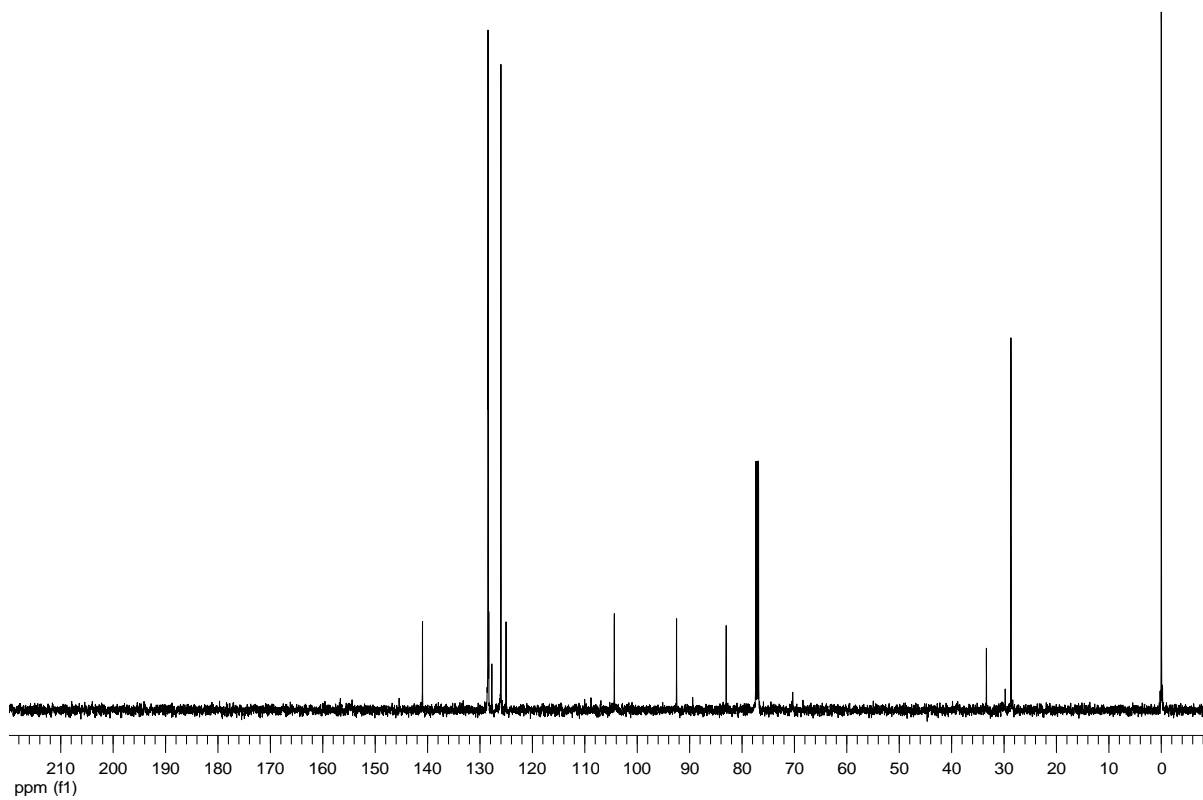

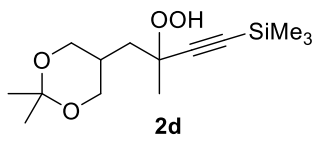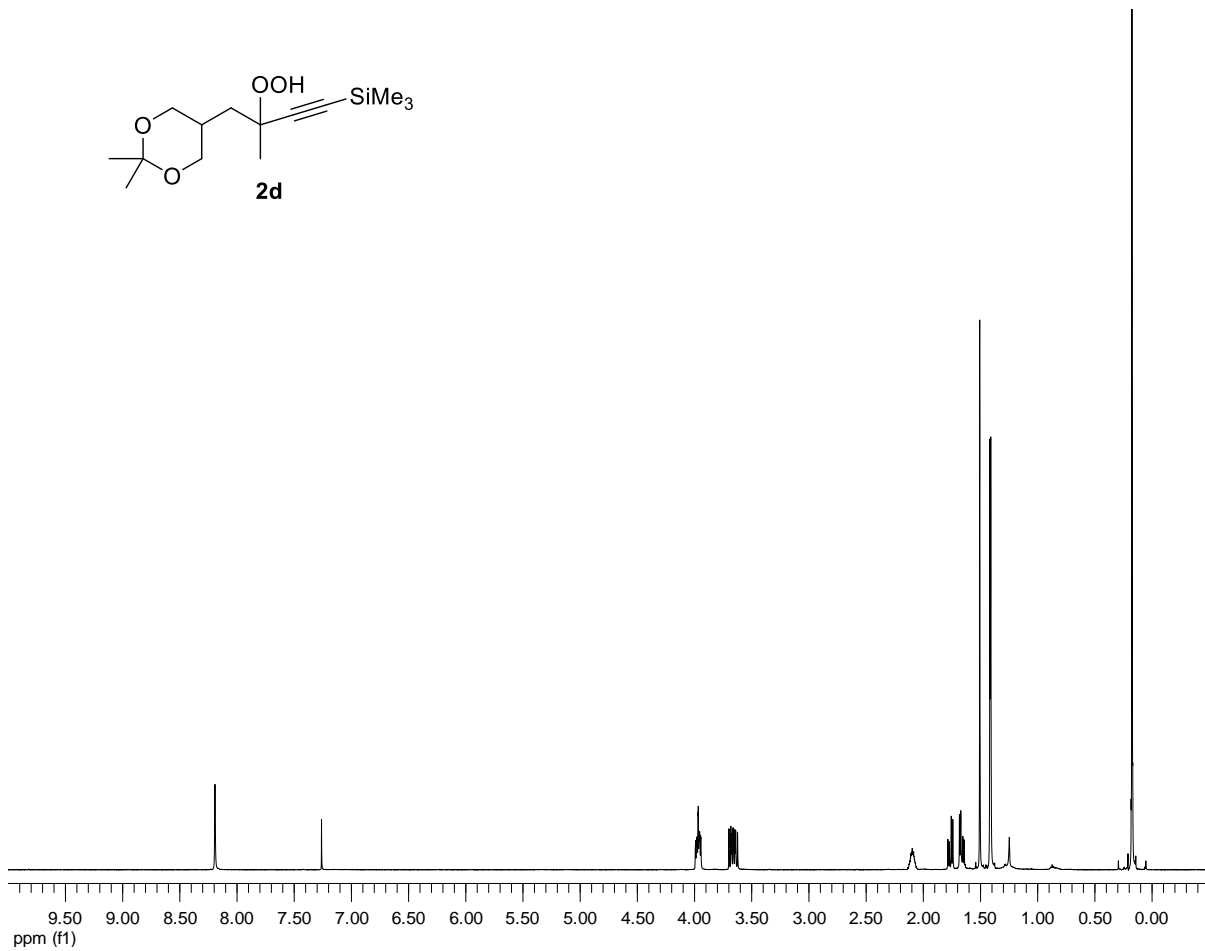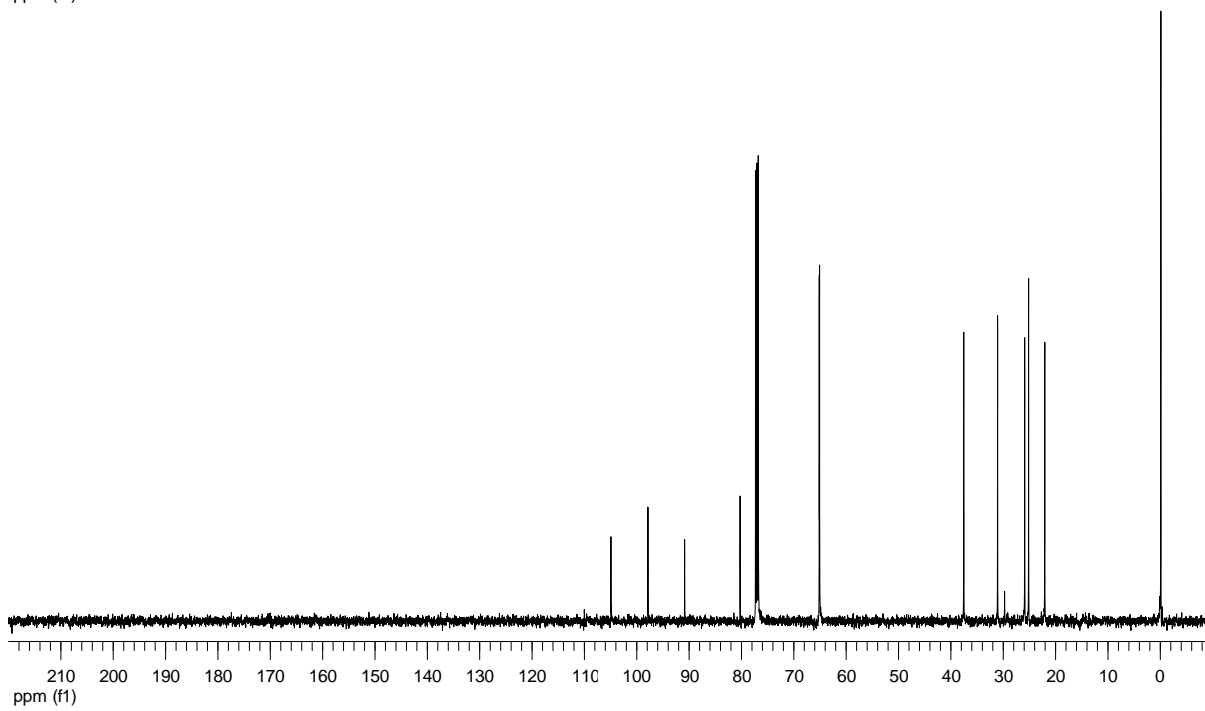

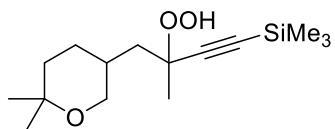

**2e** (mixture of two diastereomers)

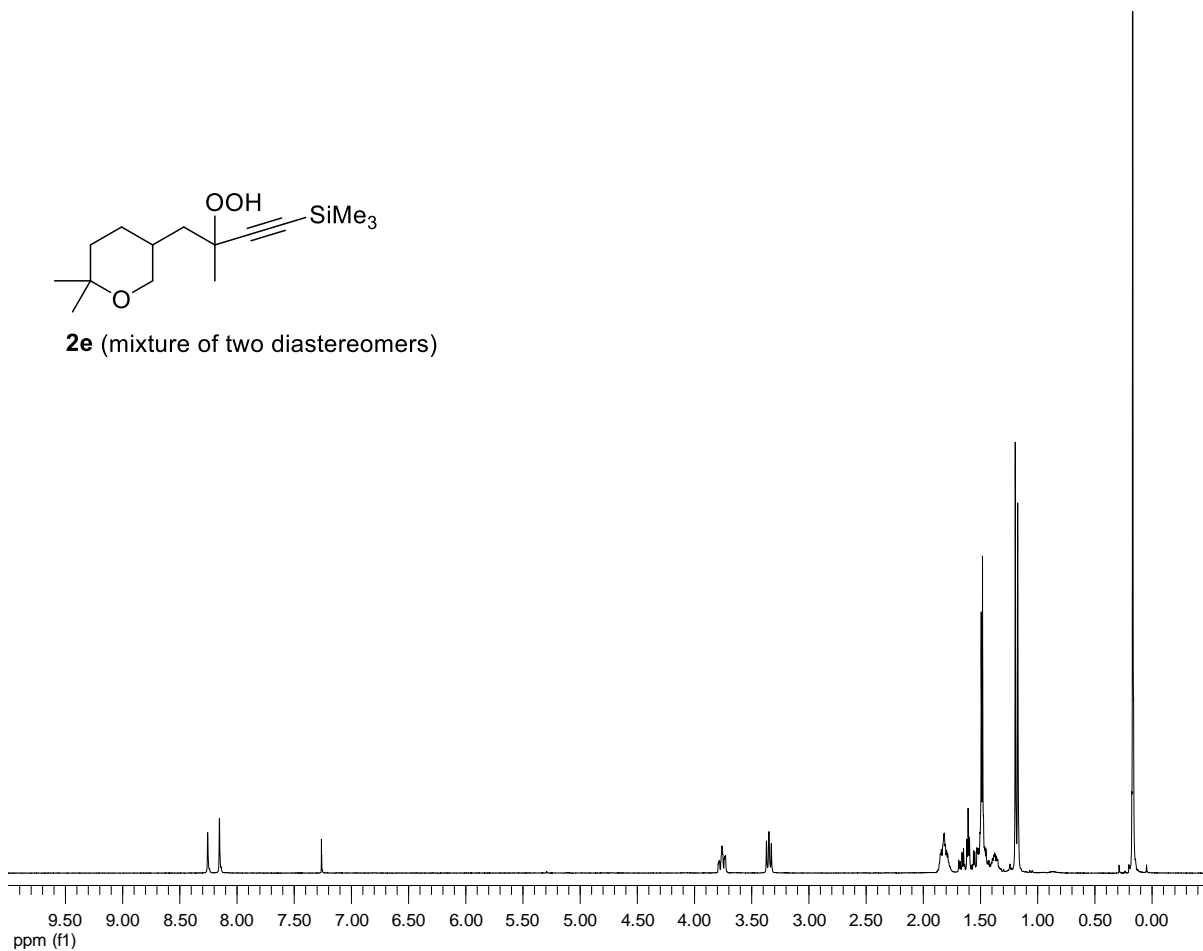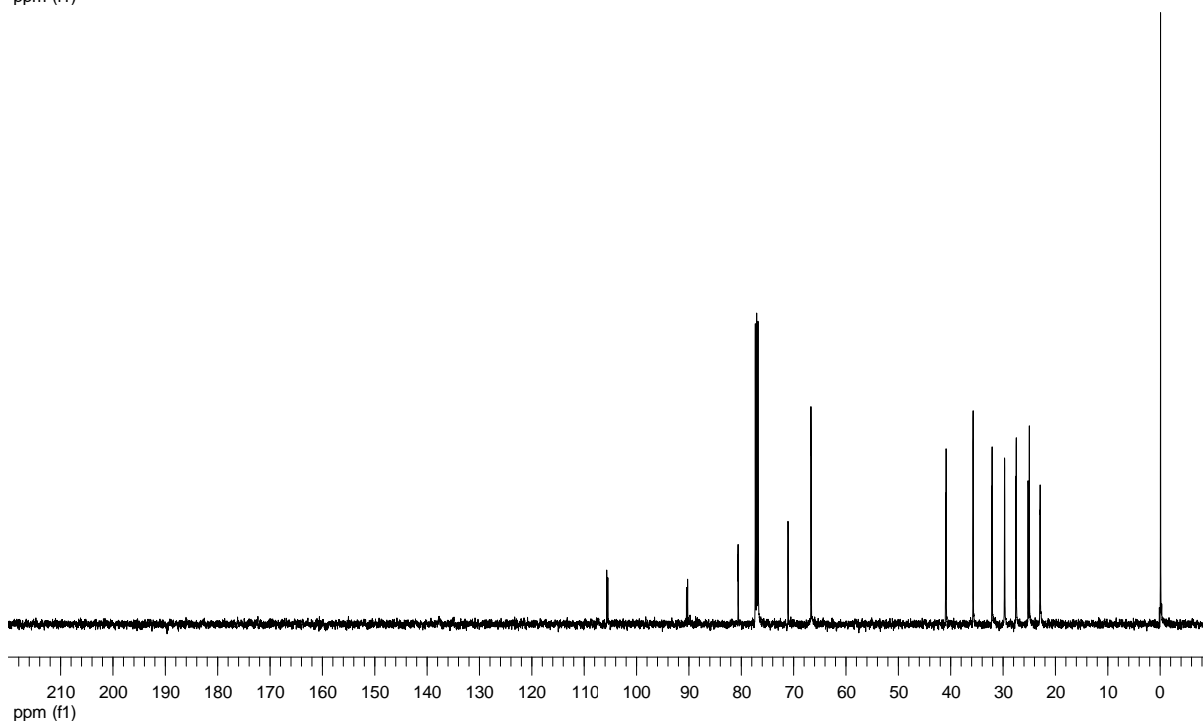

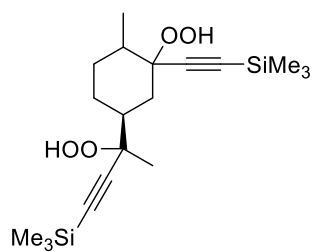

**2f** (mixture of four diastereomers)

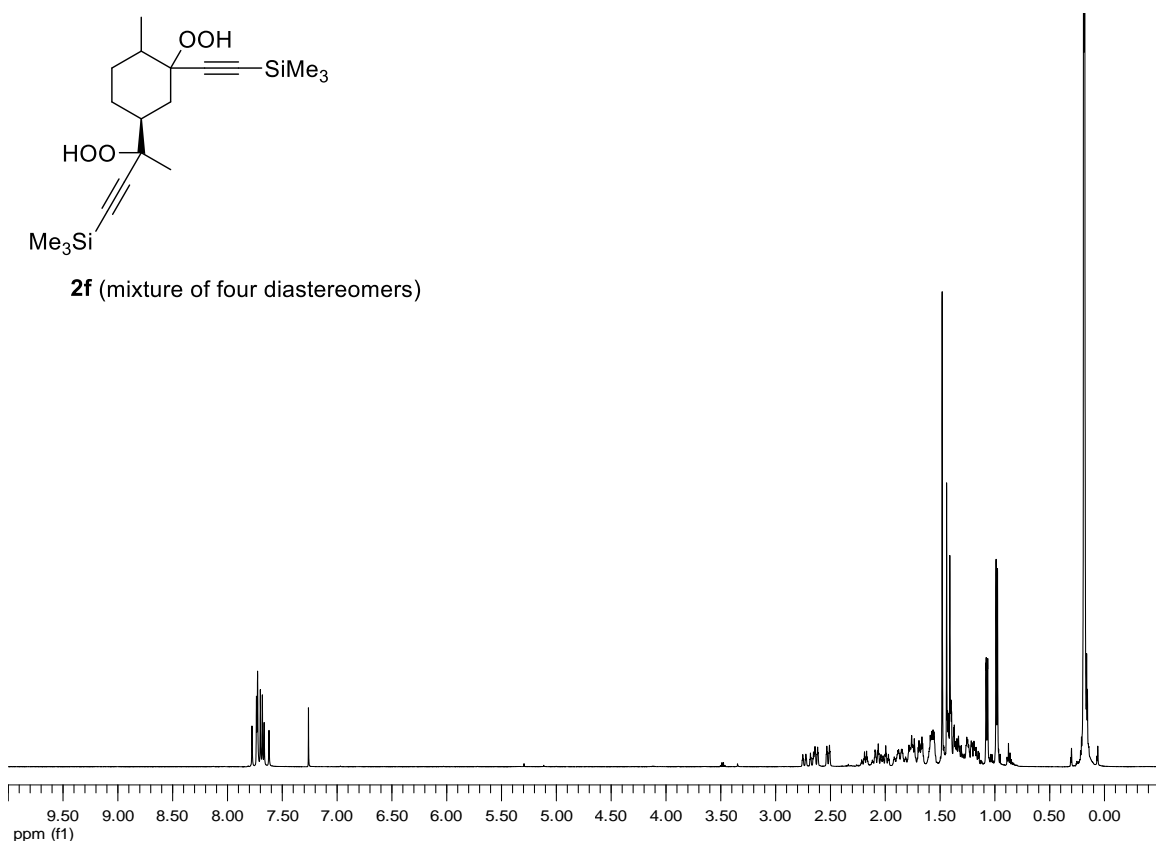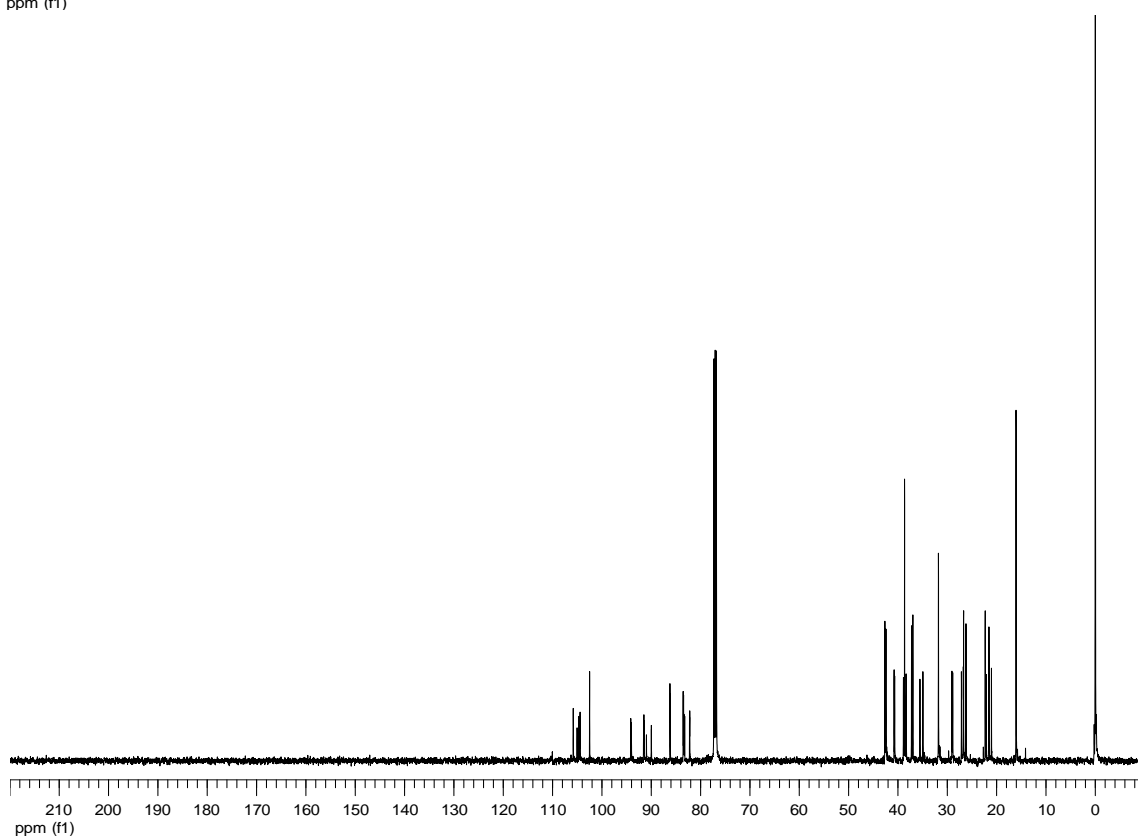

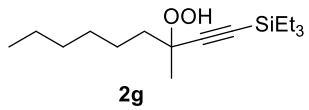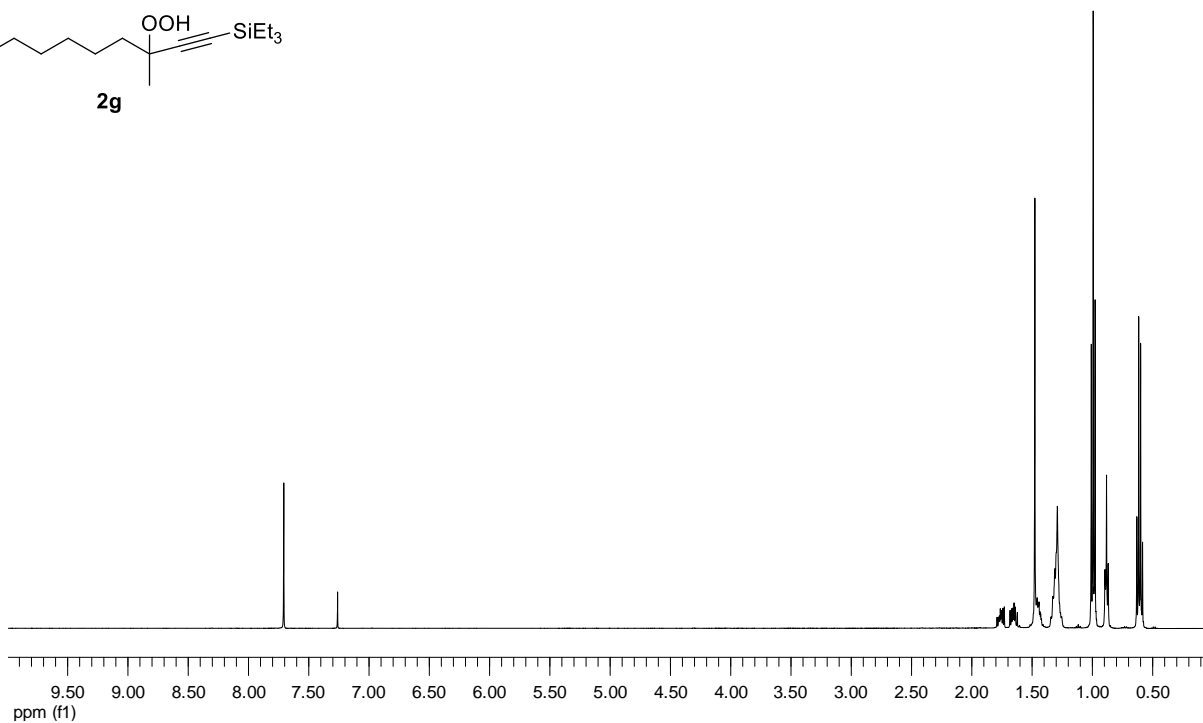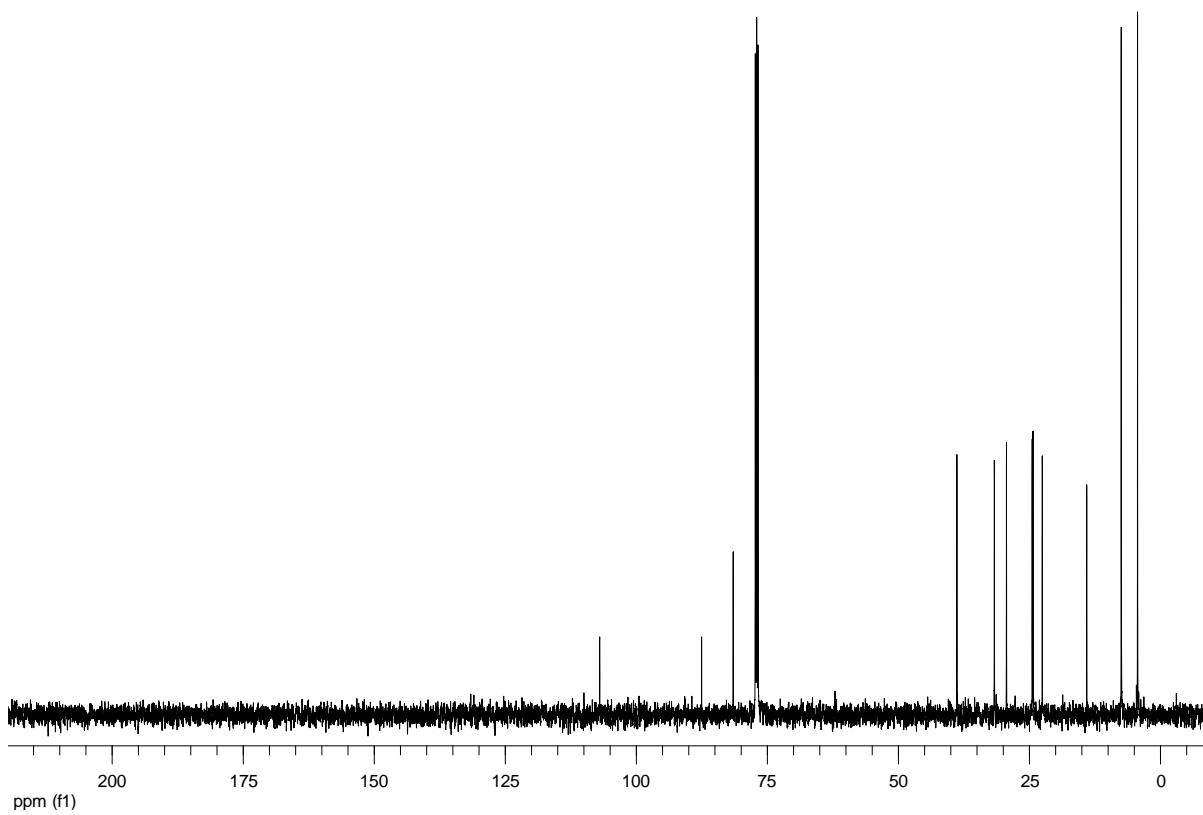

S16



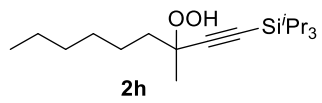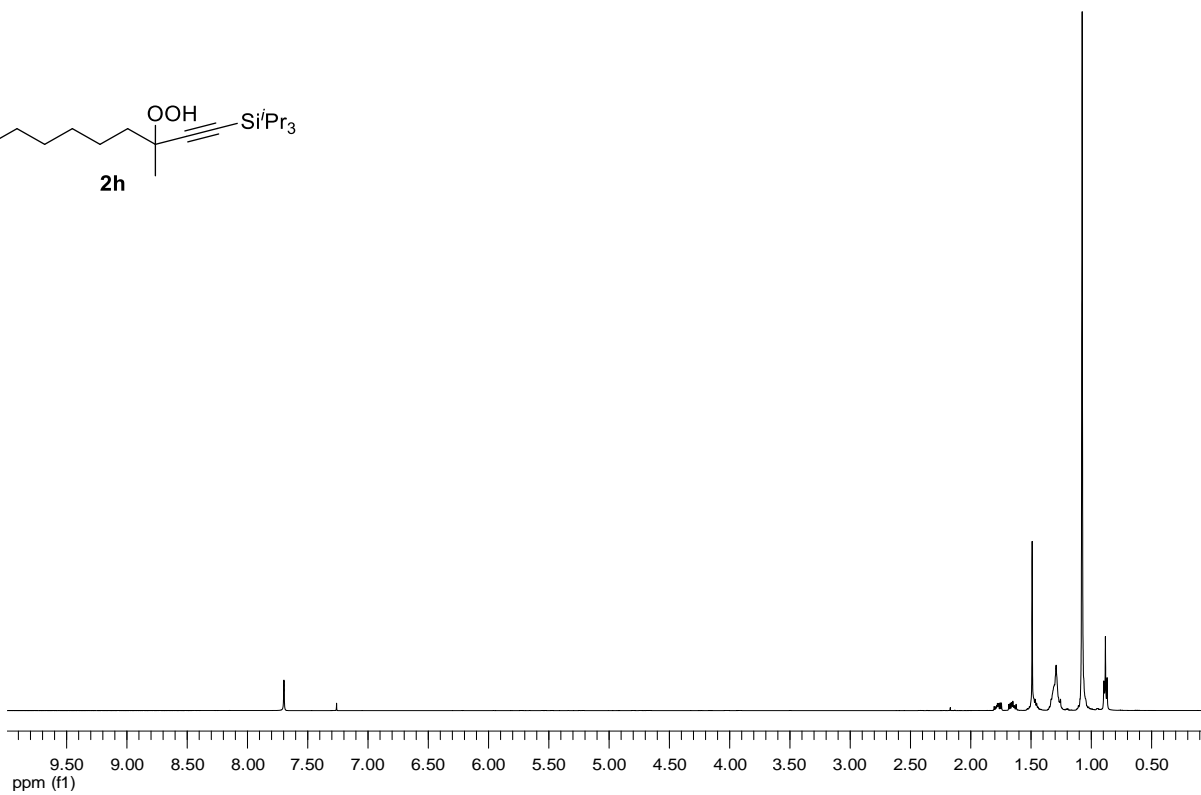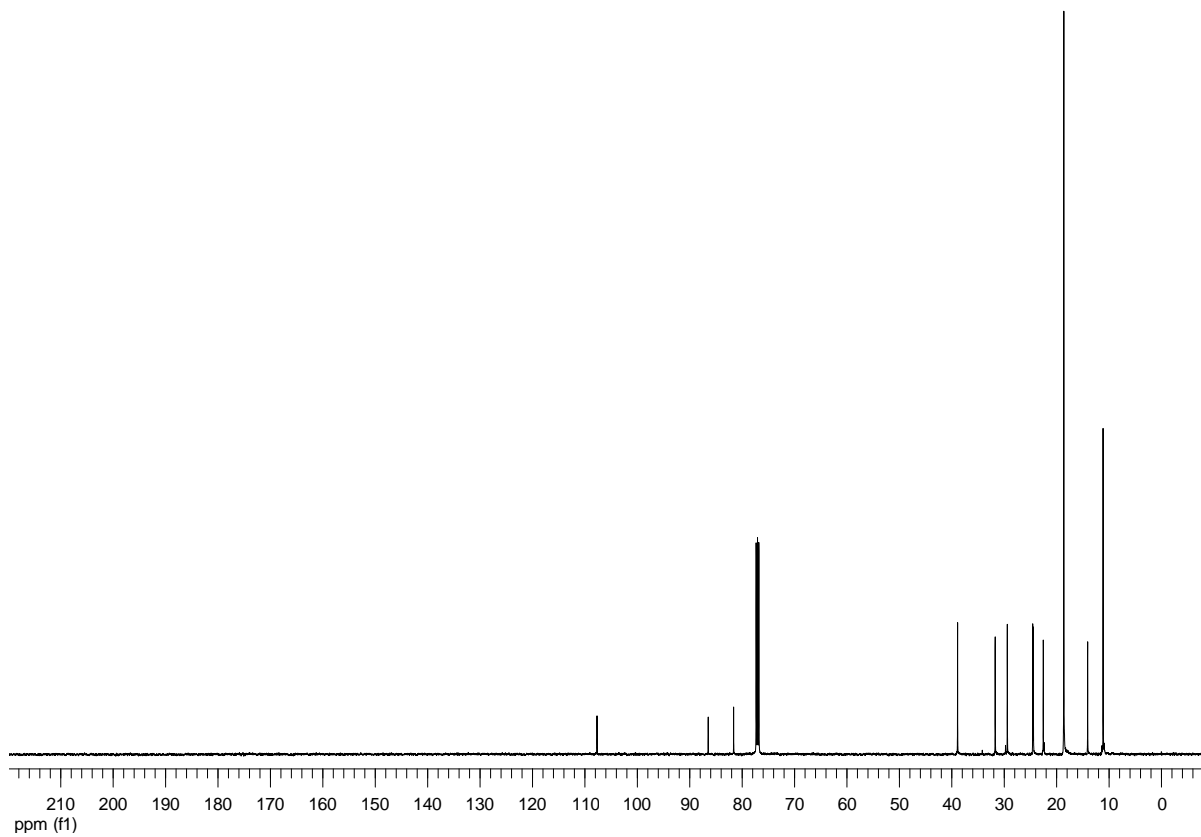

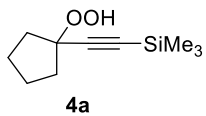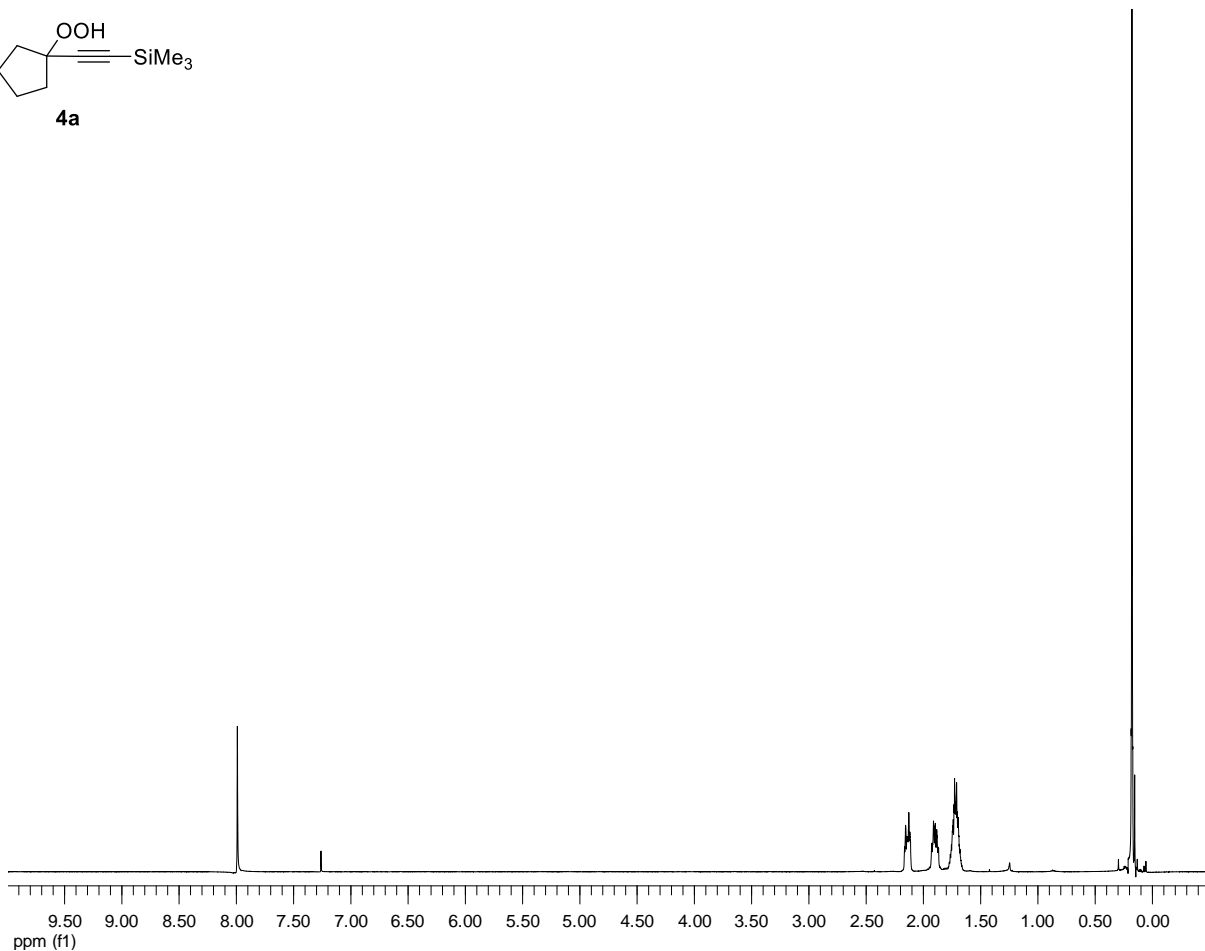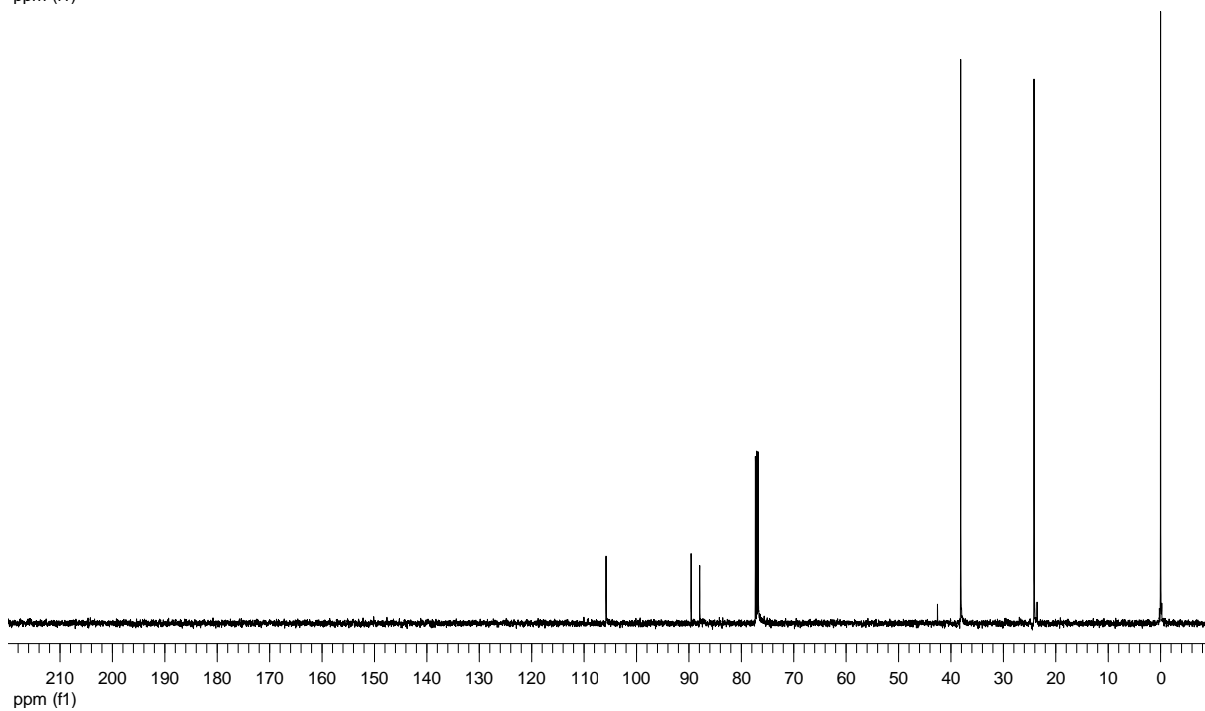

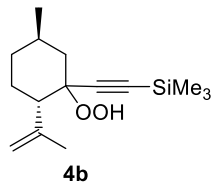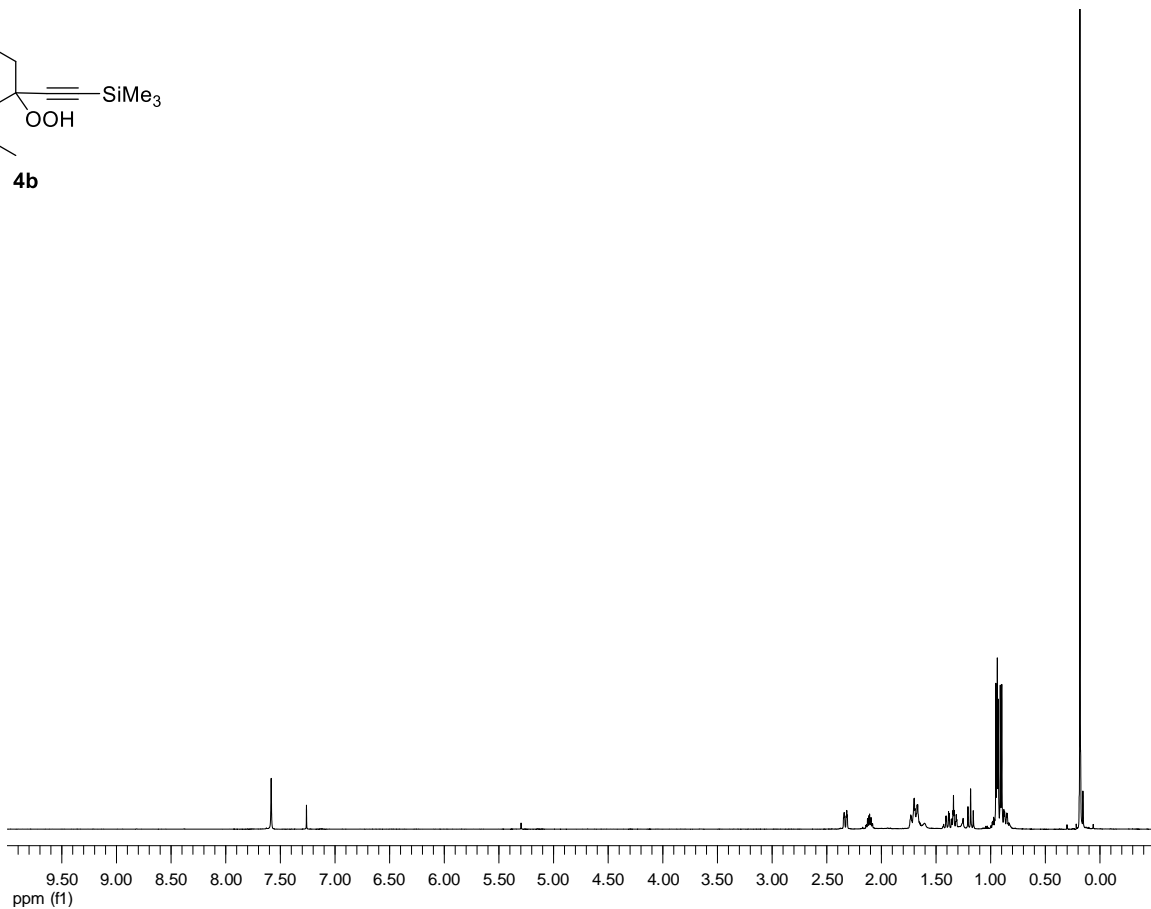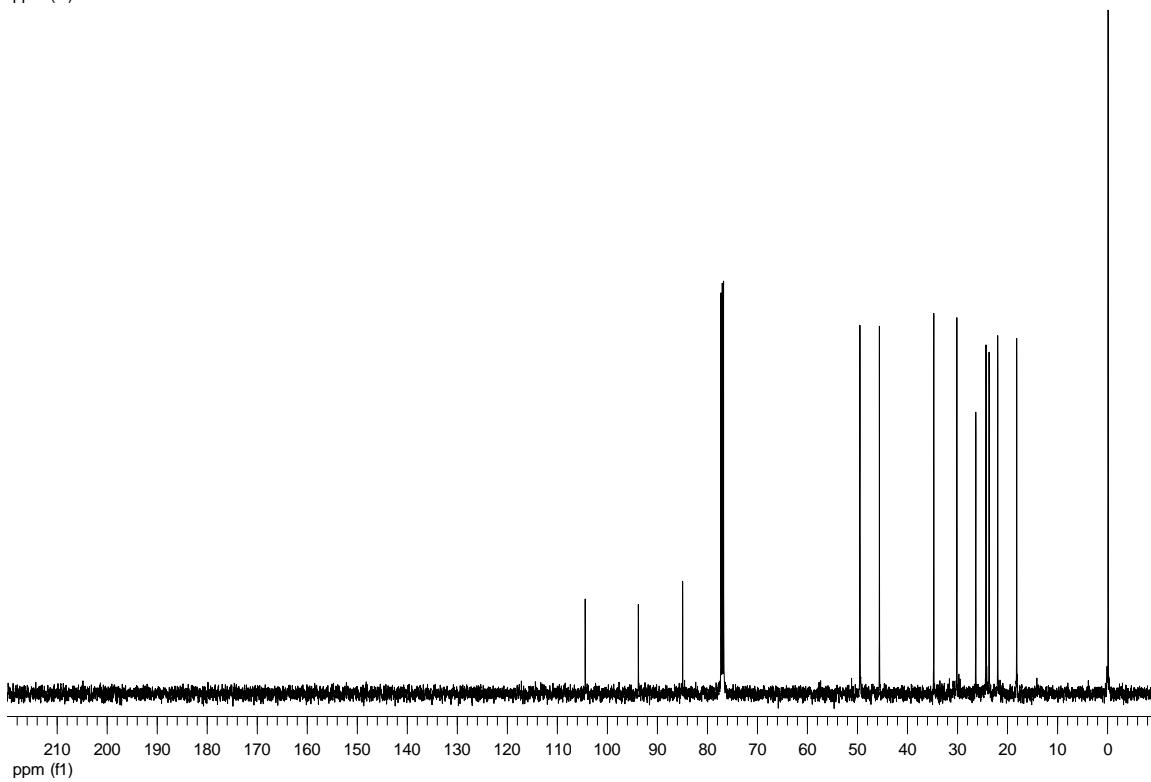

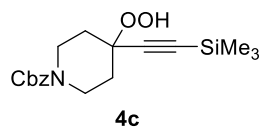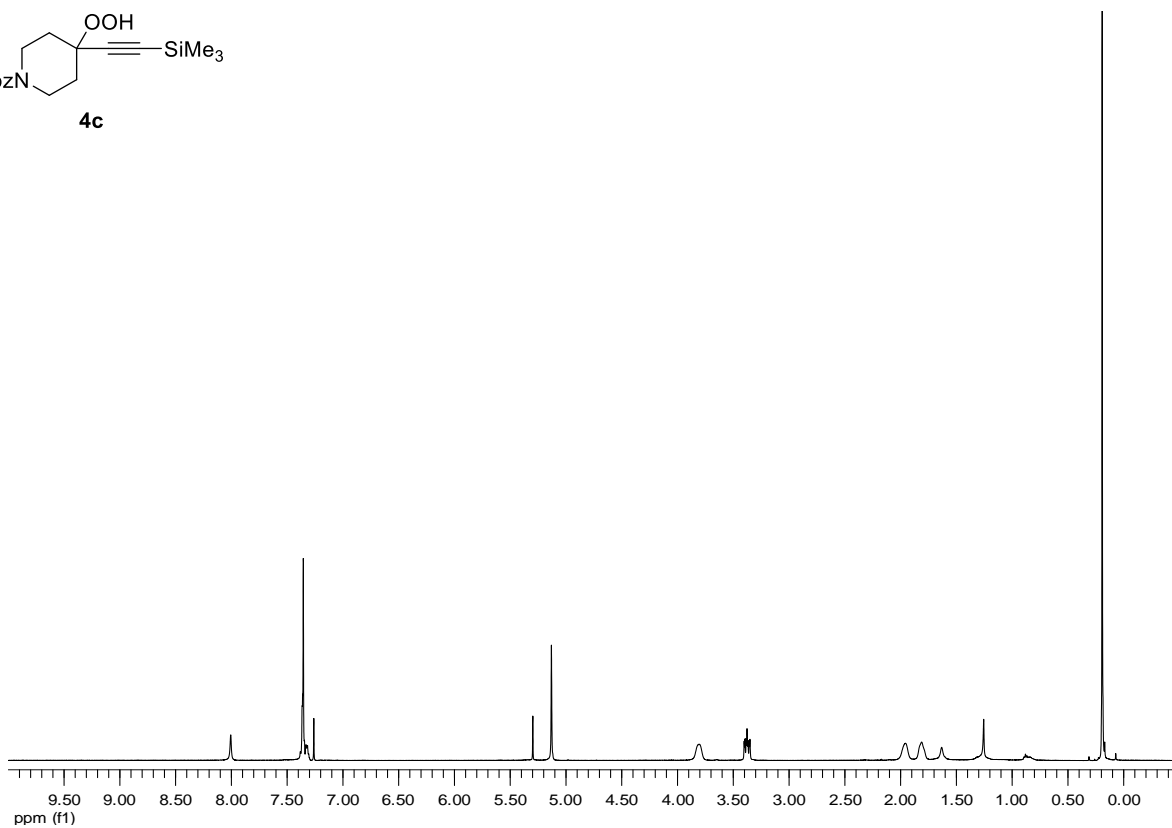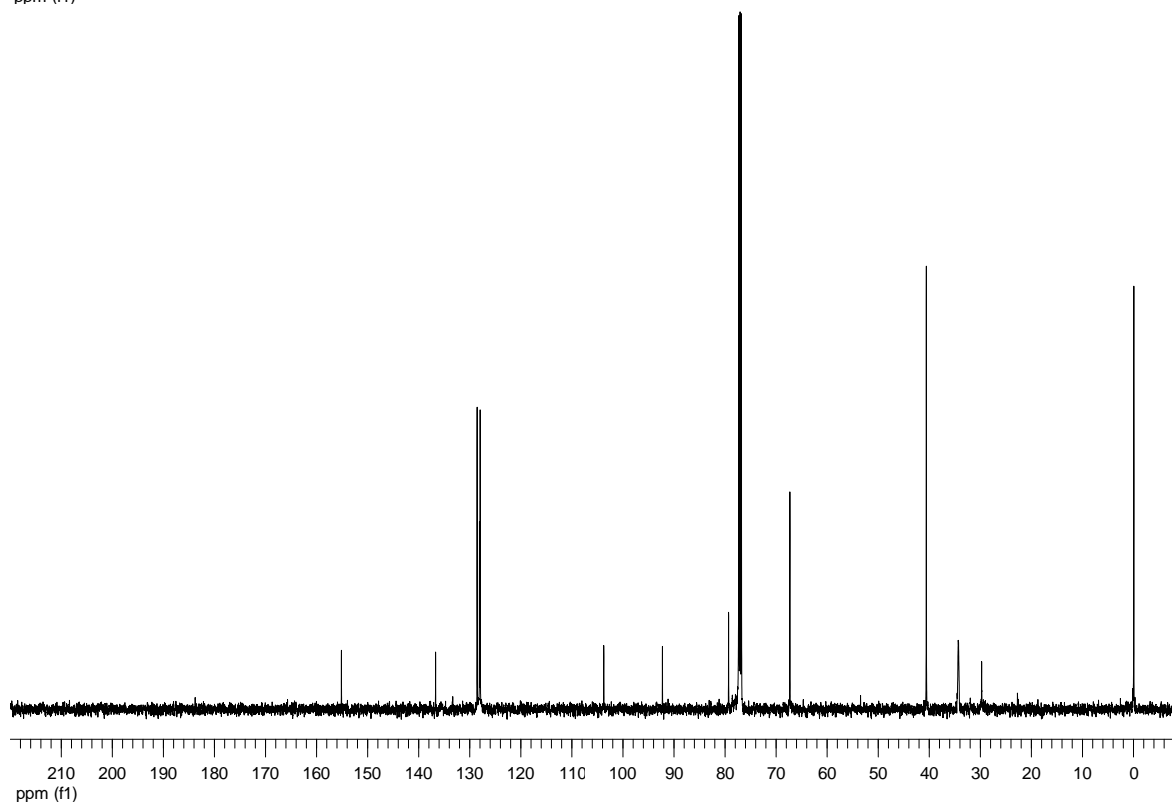

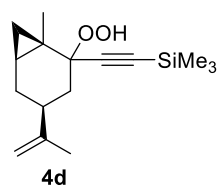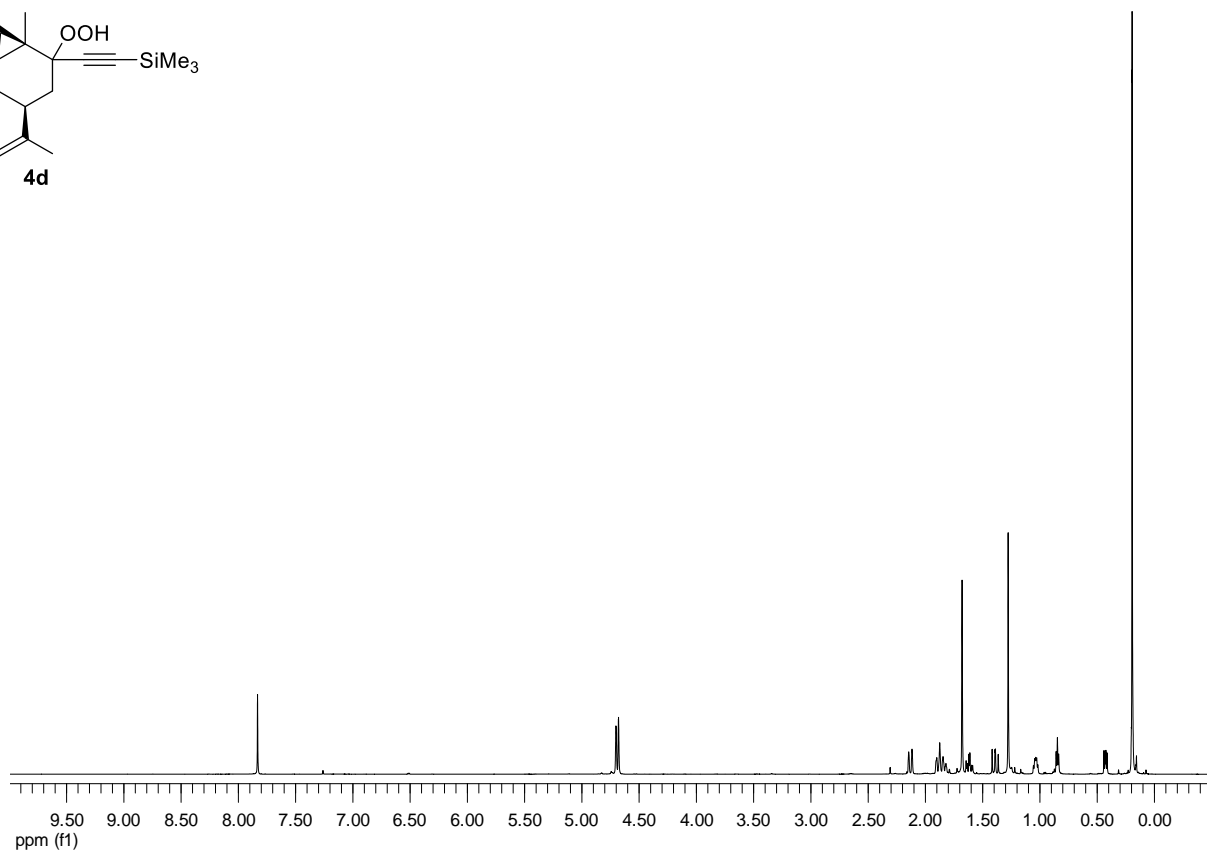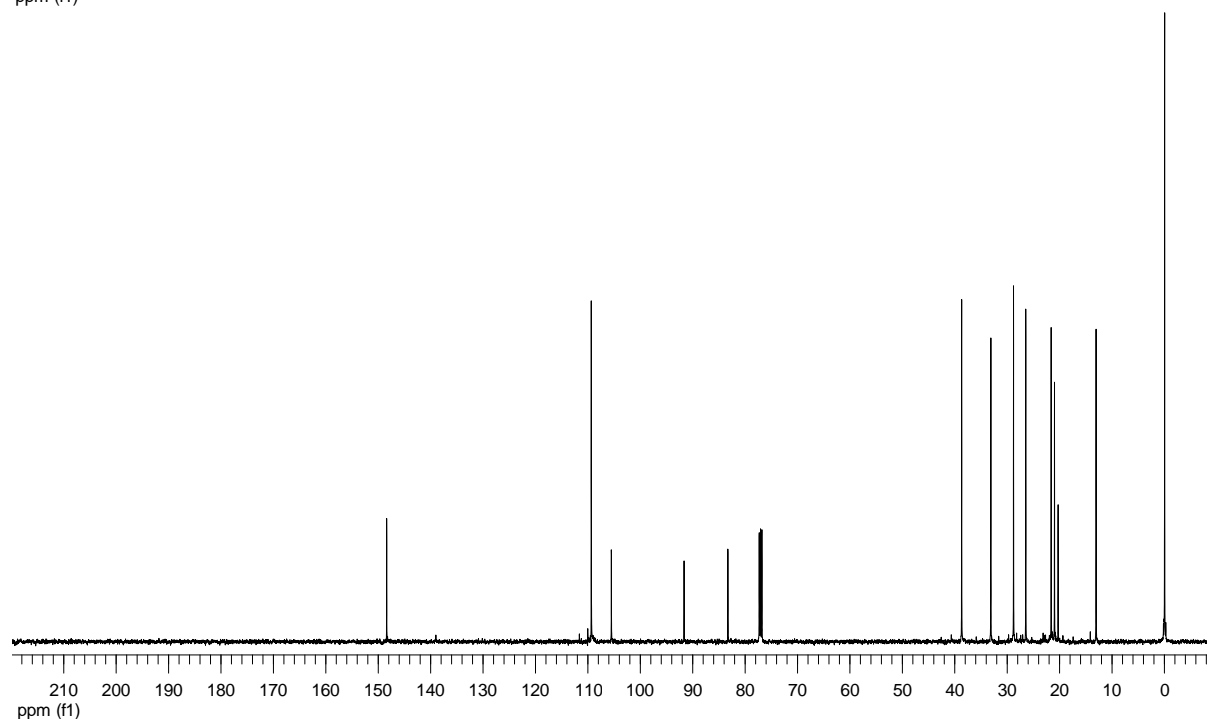

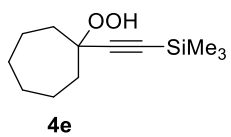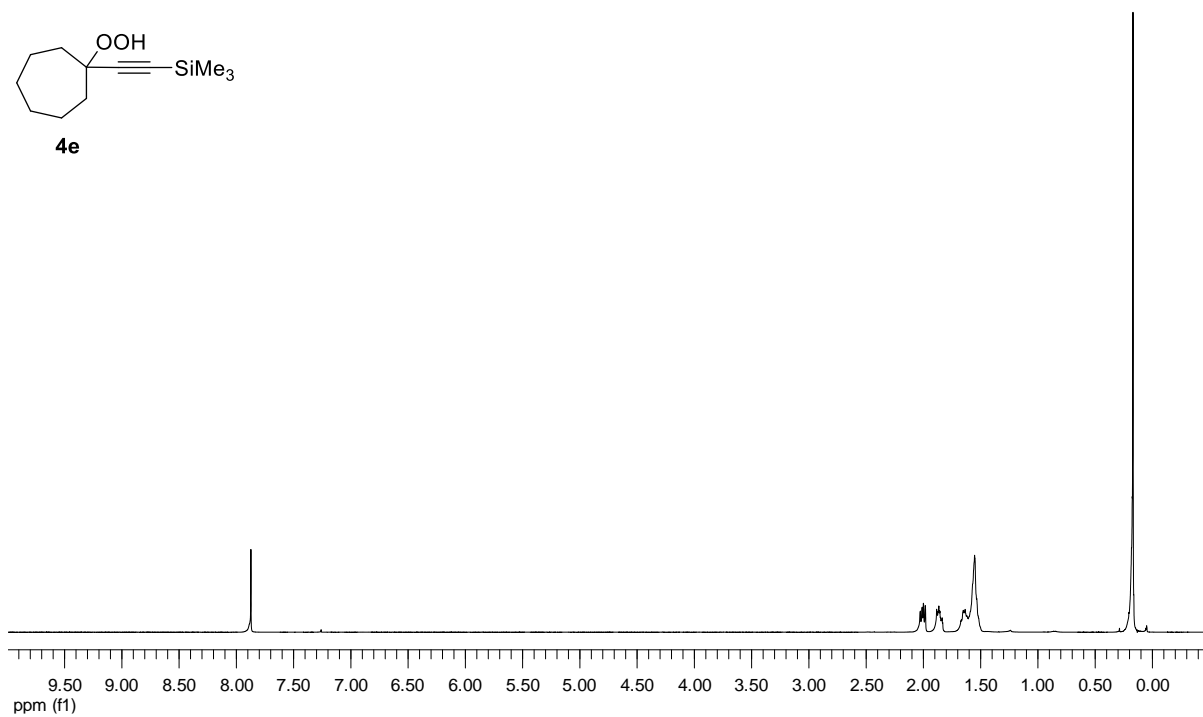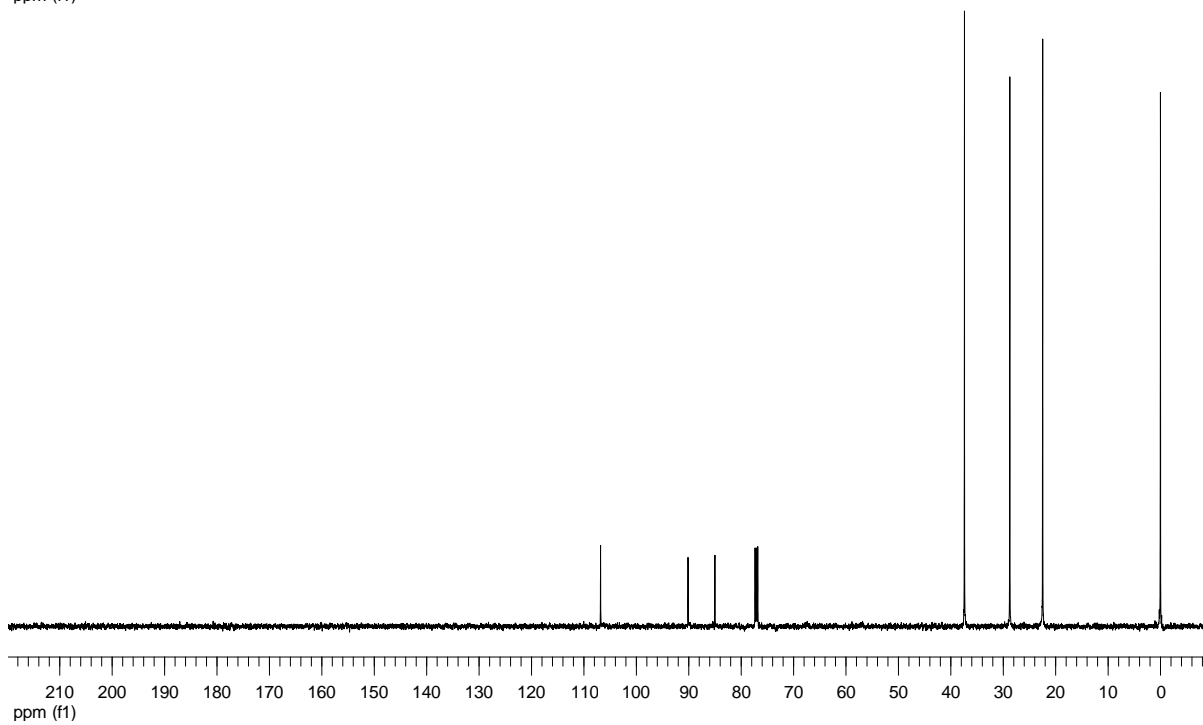

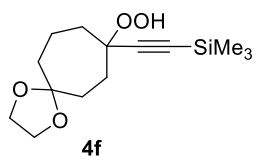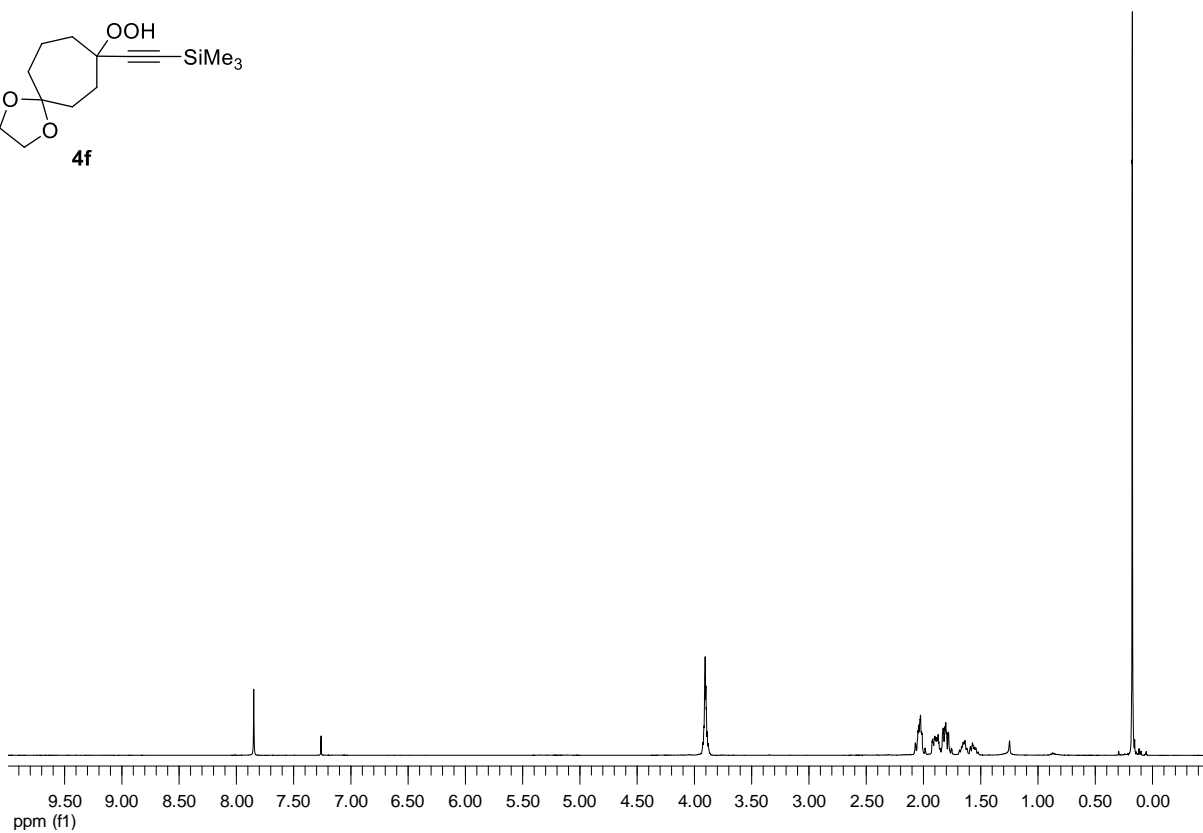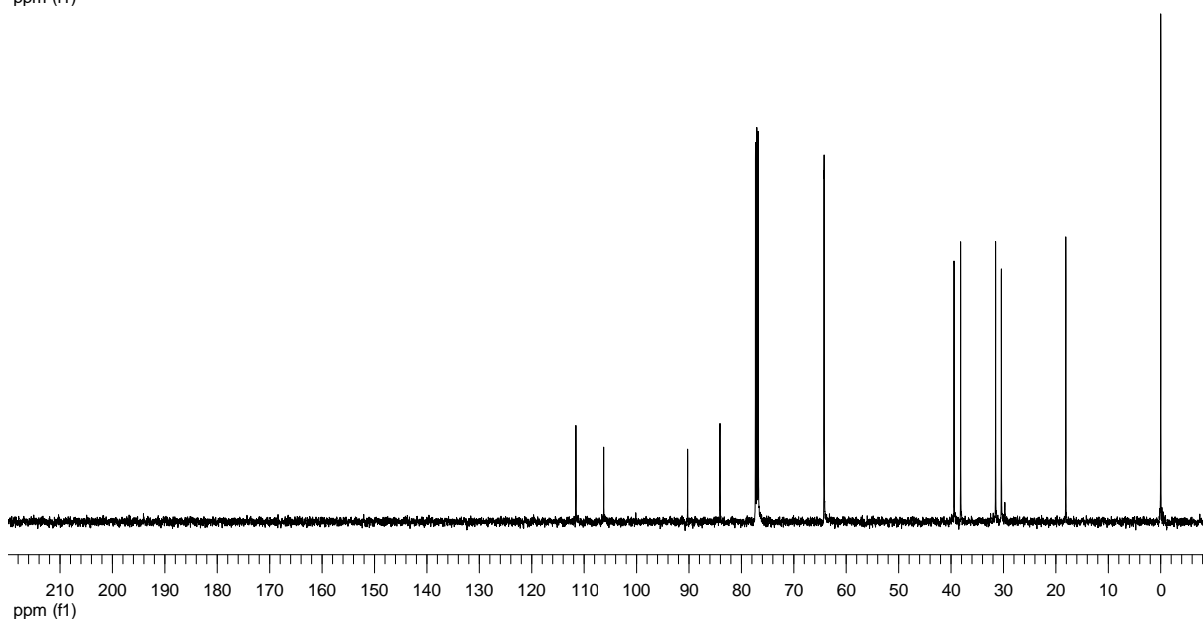

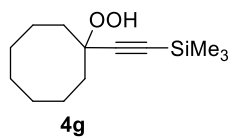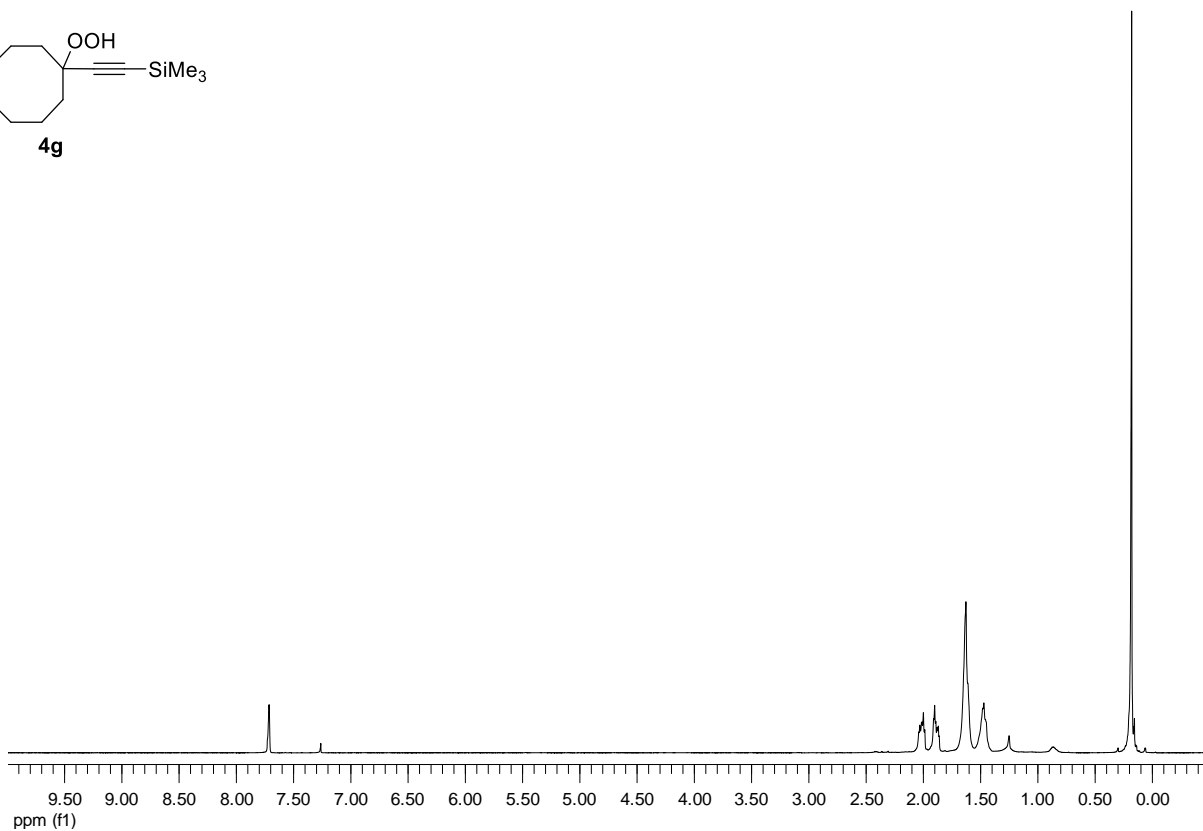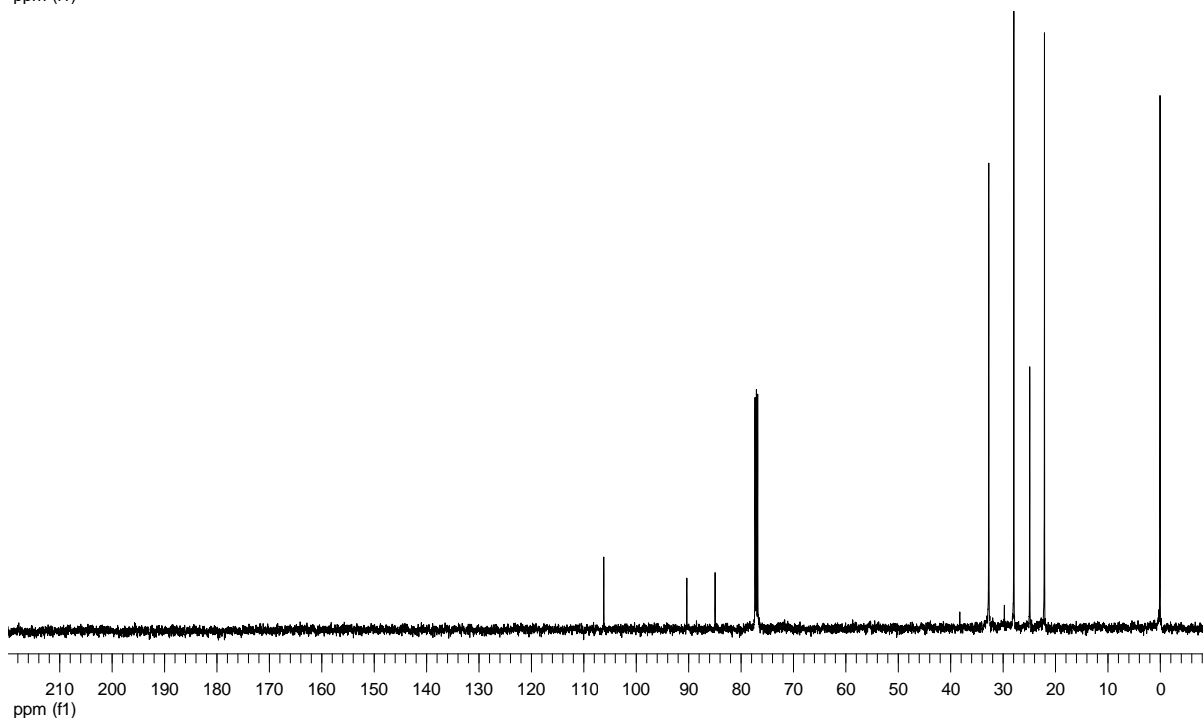



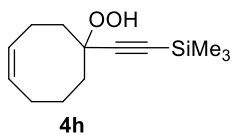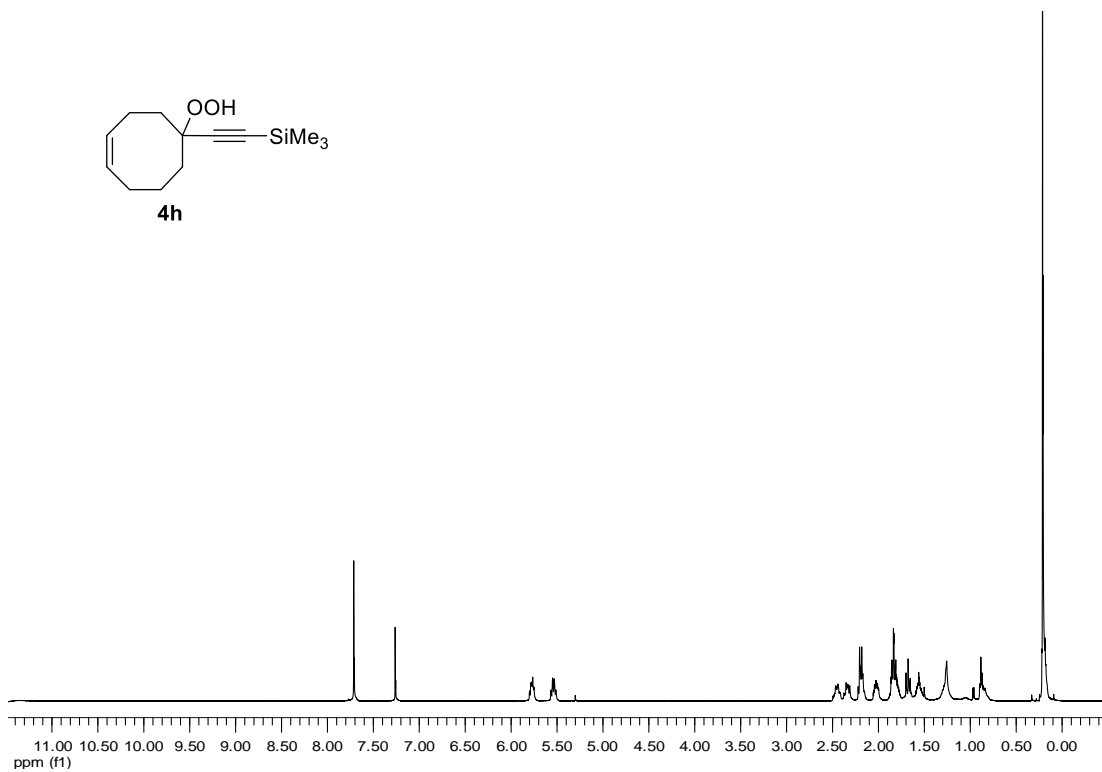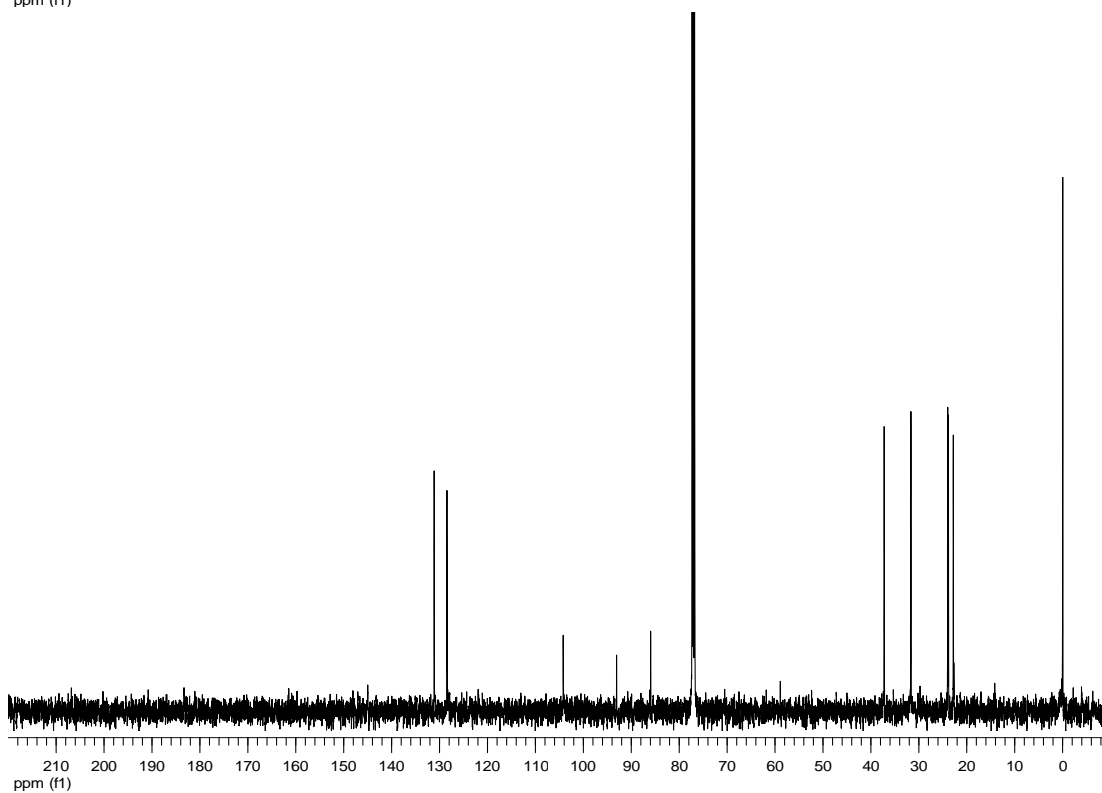

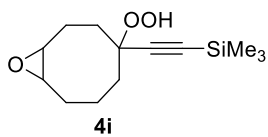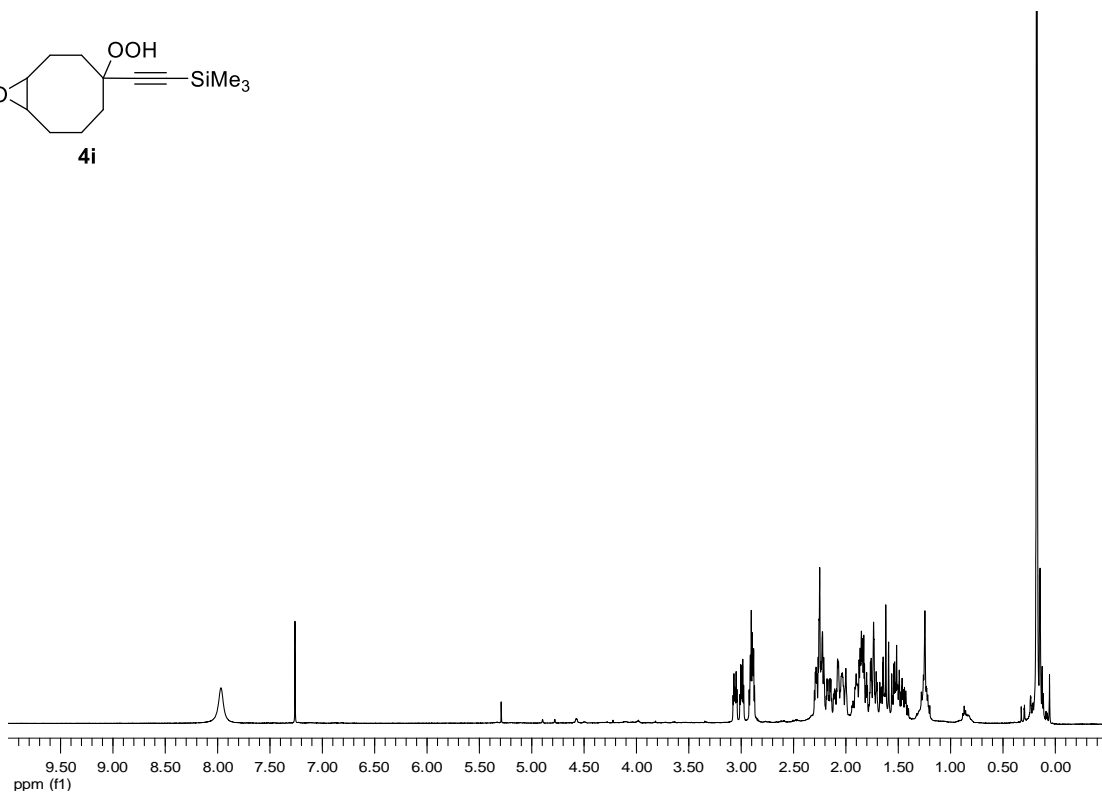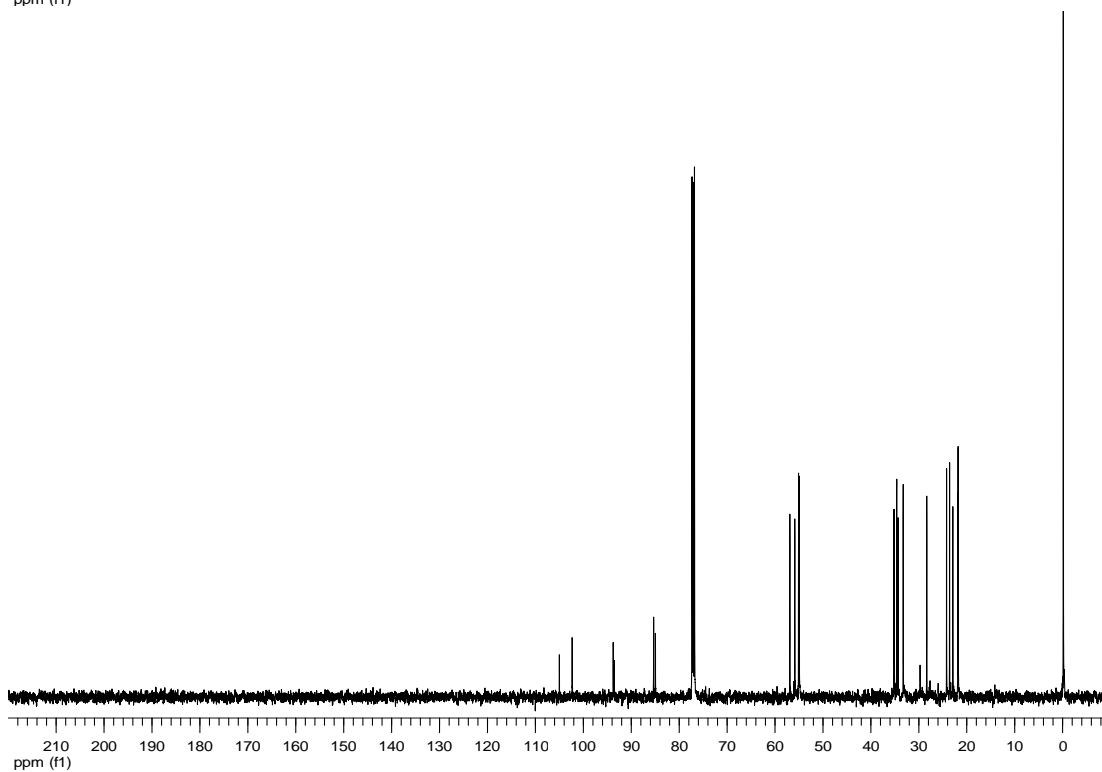

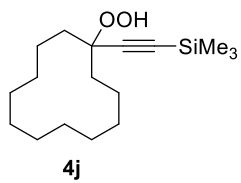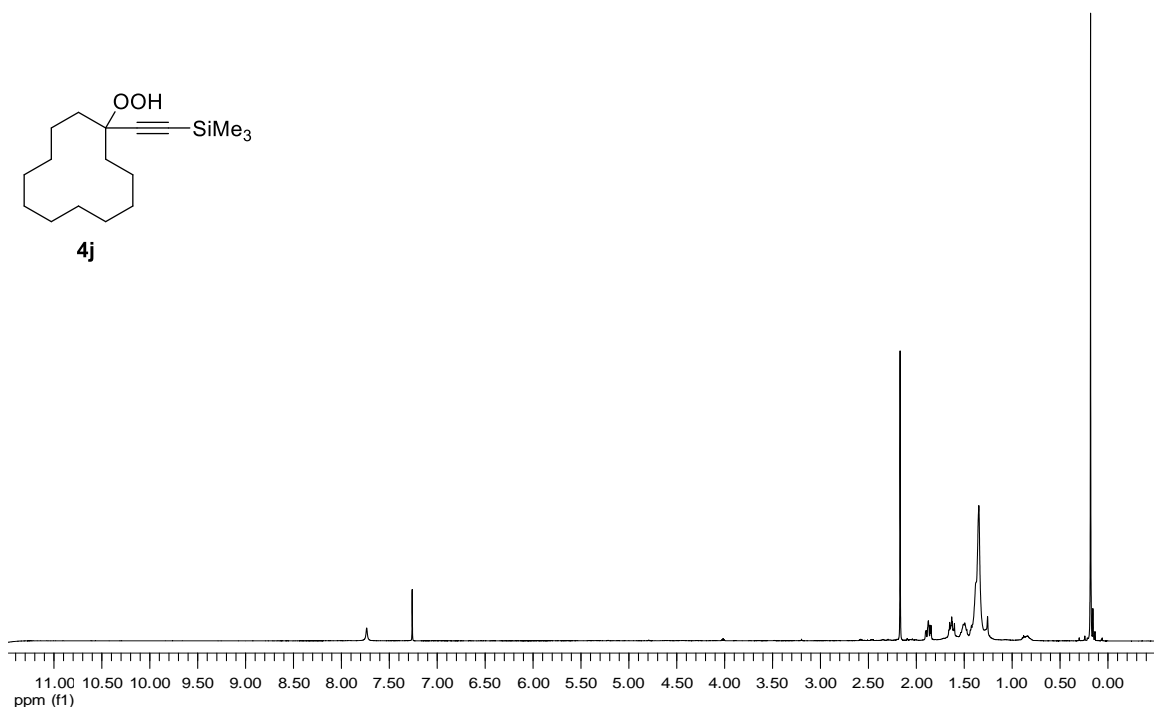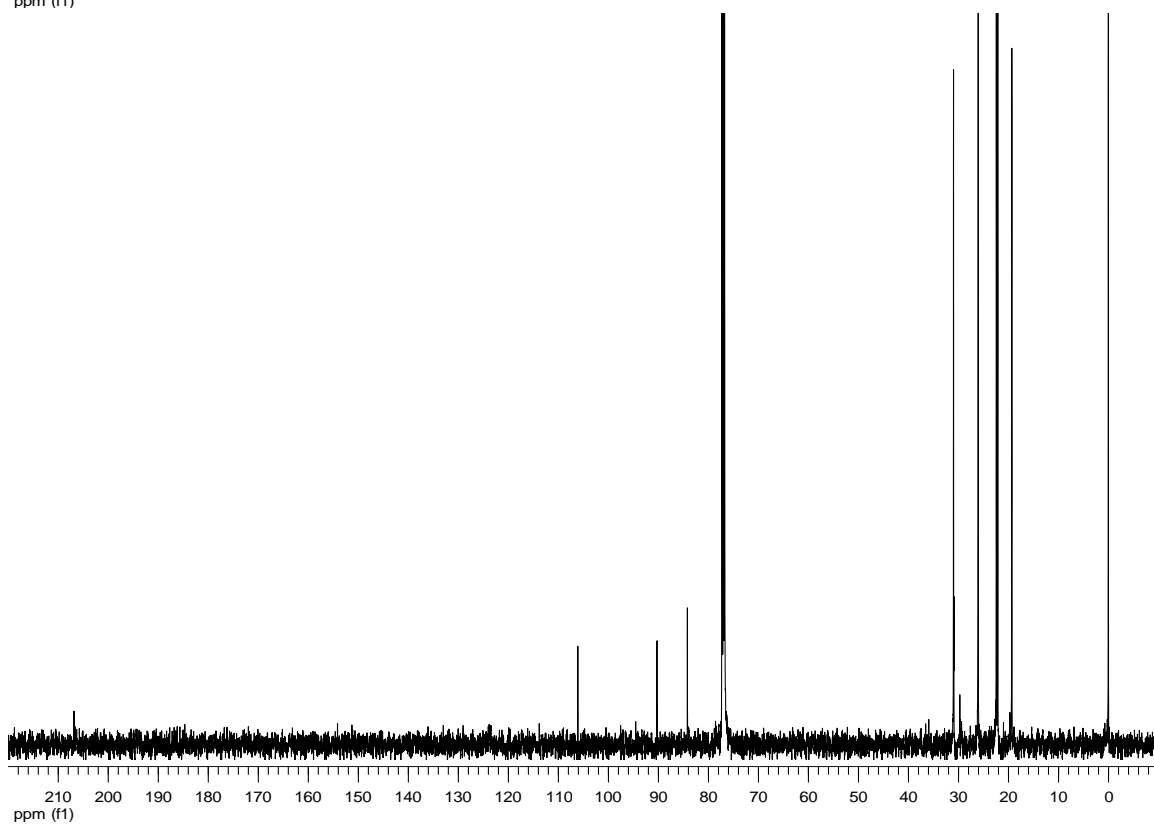

# Monitoring the Reaction of 3g to 4g by $^1\text{H}$ NMR

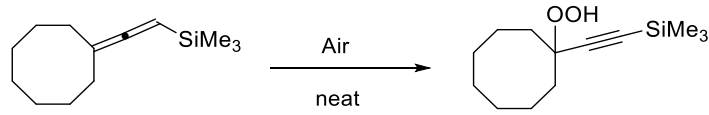

| Parameter                  | Value                                                                        |
|----------------------------|------------------------------------------------------------------------------|
| 1 Data File Name           | C:/Users/sudhavenkat/Desktop/sg-1118 nmr monitor/sg-1118 nmr monitor/ 1/ fid |
| 2 Title                    | sg-1118 nmr monitor.1.fid                                                    |
| 3 Comment                  | H1 standard parameters, BBO probe.                                           |
| 4 Origin                   | Bruker BioSpin GmbH                                                          |
| 5 Owner                    | sgupta97                                                                     |
| 6 Site                     |                                                                              |
| 7 Spectrometer             | spect                                                                        |
| 8 Author                   |                                                                              |
| 9 Solvent                  | CDCl3                                                                        |
| 10 Temperature             | 297.2                                                                        |
| 11 Pulse Sequence          | zg                                                                           |
| 12 Experiment              | 1D                                                                           |
| 13 Probe                   | 5 mm BBO BB-1H Z8007/ 0099                                                   |
| 14 Number of Scans         | 8                                                                            |
| 15 Receiver Gain           | 45.3                                                                         |
| 16 Relaxation Delay        | 1.0000                                                                       |
| 17 Pulse Width             | 3.5000                                                                       |
| 18 Presaturation Frequency |                                                                              |
| 19 Acquisition Time        | 2.7263                                                                       |
| 20 Acquisition Date        | 2018-07-07T22:52:58                                                          |
| 21 Modification Date       | 2018-07-09T15:31:55                                                          |
| 22 Class                   |                                                                              |
| 23 Spectrometer Frequency  | 500.64                                                                       |
| 24 Spectral Width          | 6009.6                                                                       |
| 25 Lowest Frequency        | -264.0                                                                       |
| 26 Nucleus                 | $^1\text{H}$                                                                 |
| 27 Acquired Size           | 16384                                                                        |
| 28 Spectral Size           | 65536                                                                        |

~ 30 % conv, this initial conversion had already occurred while taking first NMR of the allene which indicates conversion already occurred during rotavap or in the process of preparing NMR sample.

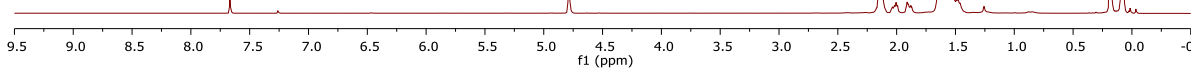

| Parameter                  | Value                                                                        |
|----------------------------|------------------------------------------------------------------------------|
| 1 Data File Name           | C:/Users/sudhavenkat/Desktop/sg-1118 nmr monitor/sg-1118 nmr monitor/ 2/ fid |
| 2 Title                    | sg-1118 nmr monitor.2.fid                                                    |
| 3 Comment                  | H1 standard parameters, BBO probe.                                           |
| 4 Origin                   | Bruker BioSpin GmbH                                                          |
| 5 Owner                    | sgupta97                                                                     |
| 6 Site                     |                                                                              |
| 7 Spectrometer             | spect                                                                        |
| 8 Author                   |                                                                              |
| 9 Solvent                  | CDCl3                                                                        |
| 10 Temperature             | 297.0                                                                        |
| 11 Pulse Sequence          | zg                                                                           |
| 12 Experiment              | 1D                                                                           |
| 13 Probe                   | 5 mm BBO BB-1H Z8007/ 0099                                                   |
| 14 Number of Scans         | 8                                                                            |
| 15 Receiver Gain           | 45.3                                                                         |
| 16 Relaxation Delay        | 1.0000                                                                       |
| 17 Pulse Width             | 3.5000                                                                       |
| 18 Presaturation Frequency |                                                                              |
| 19 Acquisition Time        | 2.7263                                                                       |
| 20 Acquisition Date        | 2018-07-07T23:34:40                                                          |
| 21 Modification Date       | 2018-07-09T15:31:57                                                          |
| 22 Class                   |                                                                              |
| 23 Spectrometer Frequency  | 500.64                                                                       |
| 24 Spectral Width          | 6009.6                                                                       |
| 25 Lowest Frequency        | -264.0                                                                       |
| 26 Nucleus                 | $^1\text{H}$                                                                 |
| 27 Acquired Size           | 16384                                                                        |
| 28 Spectral Size           | 65536                                                                        |

After 40 min of the first NMR

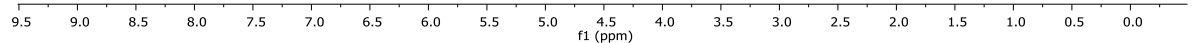

| Parameter                  | Value                                                                             |
|----------------------------|-----------------------------------------------------------------------------------|
| 1 Data File Name           | C:/ Users/ sudhavenkat/ Desktop/ sg-1118 nmr monitor/ sg-1118 nmr monitor/ 3/ fid |
| 2 Title                    | sg-1118 nmr monitor.3.fid                                                         |
| 3 Comment                  | H1 standard parameters, BBO probe.                                                |
| 4 Origin                   | Bruker BioSpin GmbH                                                               |
| 5 Owner                    | sgupta97                                                                          |
| 6 Site                     |                                                                                   |
| 7 Spectrometer             | spect                                                                             |
| 8 Author                   |                                                                                   |
| 9 Solvent                  | CDCl3                                                                             |
| 10 Temperature             | 296.9                                                                             |
| 11 Pulse Sequence          | zg                                                                                |
| 12 Experiment              | 1D                                                                                |
| 13 Probe                   | 5 mm BBO BB-1H Z8007/ 0099                                                        |
| 14 Number of Scans         | 8                                                                                 |
| 15 Receiver Gain           | 45.3                                                                              |
| 16 Relaxation Delay        | 1.0000                                                                            |
| 17 Pulse Width             | 3.5000                                                                            |
| 18 Presaturation Frequency |                                                                                   |
| 19 Acquisition Time        | 2.7263                                                                            |
| 20 Acquisition Date        | 2018-07-08T00:09:23                                                               |
| 21 Modification Date       | 2018-07-09T15:31:57                                                               |
| 22 Class                   |                                                                                   |
| 23 Spectrometer Frequency  | 500.64                                                                            |
| 24 Spectral Width          | 6009.6                                                                            |
| 25 Lowest Frequency        | -264.0                                                                            |
| 26 Nucleus                 | 1H                                                                                |
| 27 Acquired Size           | 16384                                                                             |
| 28 Spectral Size           | 65536                                                                             |

After 60 min of the first NMR

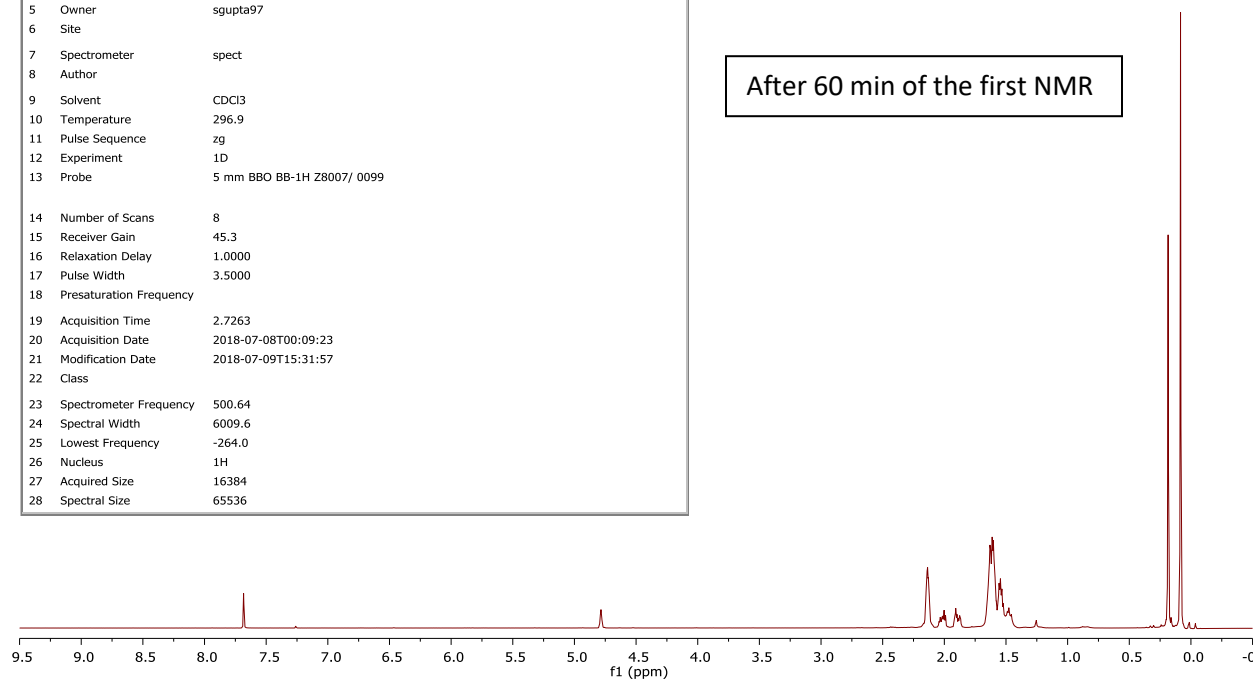

| Parameter                  | Value                                                                             |
|----------------------------|-----------------------------------------------------------------------------------|
| 1 Data File Name           | C:/ Users/ sudhavenkat/ Desktop/ sg-1118 nmr monitor/ sg-1118 nmr monitor/ 5/ fid |
| 2 Title                    | sg-1118 nmr monitor.5.fid                                                         |
| 3 Comment                  | H1 standard parameters, BBO probe.                                                |
| 4 Origin                   | Bruker BioSpin GmbH                                                               |
| 5 Owner                    | sgupta97                                                                          |
| 6 Site                     |                                                                                   |
| 7 Spectrometer             | spect                                                                             |
| 8 Author                   |                                                                                   |
| 9 Solvent                  | CDCl3                                                                             |
| 10 Temperature             | 296.9                                                                             |
| 11 Pulse Sequence          | zg                                                                                |
| 12 Experiment              | 1D                                                                                |
| 13 Probe                   | 5 mm BBO BB-1H Z8007/ 0099                                                        |
| 14 Number of Scans         | 8                                                                                 |
| 15 Receiver Gain           | 45.3                                                                              |
| 16 Relaxation Delay        | 1.0000                                                                            |
| 17 Pulse Width             | 3.5000                                                                            |
| 18 Presaturation Frequency |                                                                                   |
| 19 Acquisition Time        | 2.7263                                                                            |
| 20 Acquisition Date        | 2018-07-08T01:10:48                                                               |
| 21 Modification Date       | 2018-07-09T15:31:59                                                               |
| 22 Class                   |                                                                                   |
| 23 Spectrometer Frequency  | 500.64                                                                            |
| 24 Spectral Width          | 6009.6                                                                            |
| 25 Lowest Frequency        | -264.0                                                                            |
| 26 Nucleus                 | 1H                                                                                |
| 27 Acquired Size           | 16384                                                                             |
| 28 Spectral Size           | 65536                                                                             |

After 120 min of the first NMR

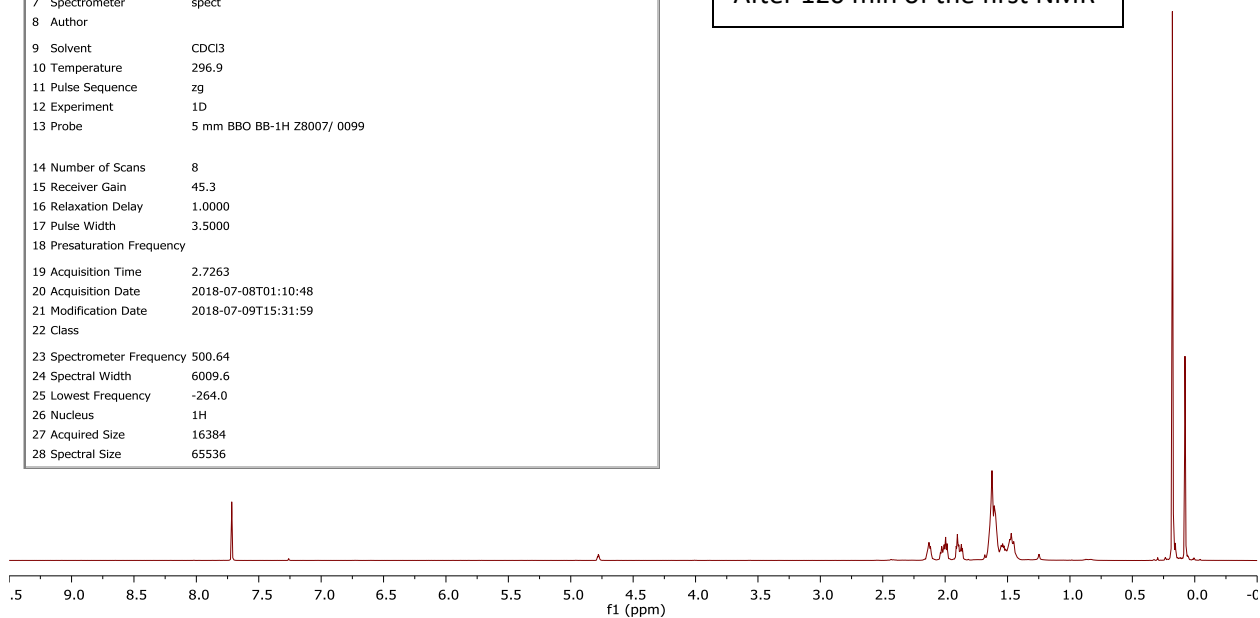

| Parameter                  | Value                                                                            |
|----------------------------|----------------------------------------------------------------------------------|
| 1 Data File Name           | C:/ Users/ sudhavenkat/ Desktop/ sg-1118 nmr monitor/ sg-1118 nmr monitor/ 6/ fd |
| 2 Title                    | sg-1118 nmr monitor.6.fid                                                        |
| 3 Comment                  | H1 standard parameters, BBO probe.                                               |
| 4 Origin                   | Bruker BioSpin GmbH                                                              |
| 5 Owner                    | sgupta97                                                                         |
| 6 Site                     |                                                                                  |
| 7 Spectrometer             | spect                                                                            |
| 8 Author                   |                                                                                  |
| 9 Solvent                  | CDCl3                                                                            |
| 10 Temperature             | 296.8                                                                            |
| 11 Pulse Sequence          | zg                                                                               |
| 12 Experiment              | 1D                                                                               |
| 13 Probe                   | 5 mm BBO BB-1H Z8007/ 0099                                                       |
| 14 Number of Scans         | 8                                                                                |
| 15 Receiver Gain           | 45.3                                                                             |
| 16 Relaxation Delay        | 1.0000                                                                           |
| 17 Pulse Width             | 3.5000                                                                           |
| 18 Presaturation Frequency |                                                                                  |
| 19 Acquisition Time        | 2.7263                                                                           |
| 20 Acquisition Date        | 2018-07-08T01:52:27                                                              |
| 21 Modification Date       | 2018-07-09T15:32:00                                                              |
| 22 Class                   |                                                                                  |
| 23 Spectrometer Frequency  | 500.64                                                                           |
| 24 Spectral Width          | 6009.6                                                                           |
| 25 Lowest Frequency        | -264.0                                                                           |
| 26 Nucleus                 | 1H                                                                               |
| 27 Acquired Size           | 16384                                                                            |
| 28 Spectral Size           | 65536                                                                            |

After 160 min of the first NMR  
> 90 % conversion

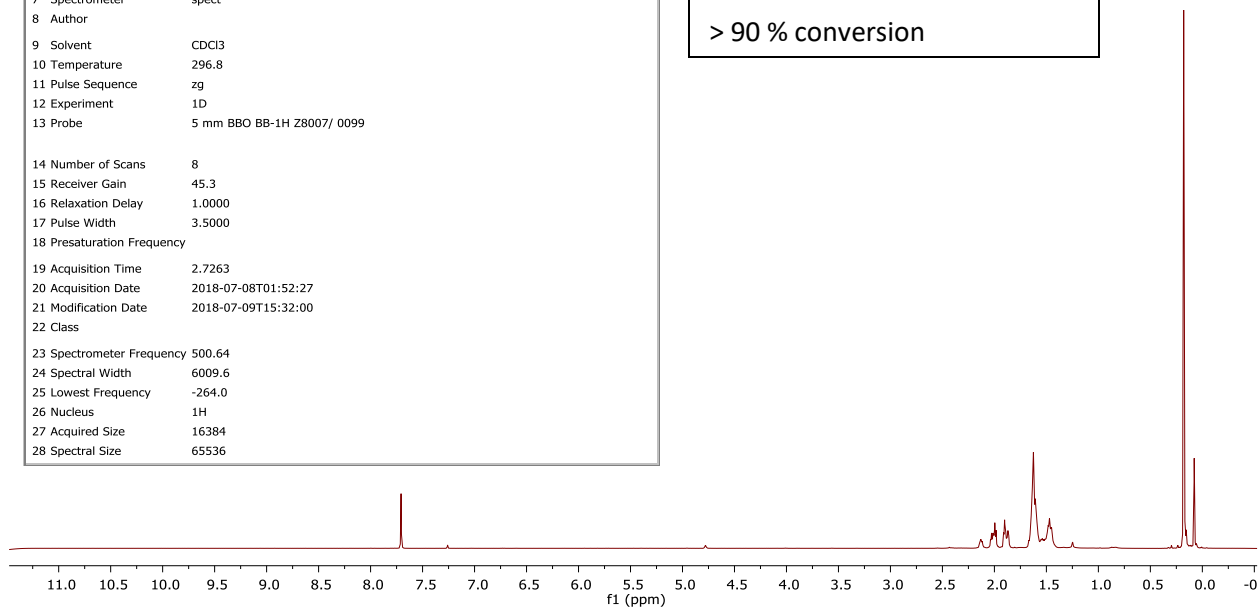

## 1. Computational Details

All calculations were carried out with the Gaussian 09 suite of computational programs.<sup>1</sup> The geometries for all species were optimized using the M062X hybrid functional<sup>2</sup> at the basis set level of 6-31+G(d). Frequencies were analytically computed at the same level of theory. The bond dissociation energies (BDE) refer to the enthalpy changes at 0 K for reaction  $R-H \rightarrow R\cdot + H\cdot$ .

## 2. Originally Calculated Energy Values

| Species                        | Enthalpies (in a.u.) |
|--------------------------------|----------------------|
| <b>H<sub>a</sub> (radical)</b> | -0.494305            |
| <b>1m'</b>                     | -547.268718          |
| <b>1m'-radical</b>             | -546.635423          |
| <b>1m</b>                      | -798.67353           |
| <b>1m-radical</b>              | -798.04992           |
| <b>G1a</b>                     | -720.161094          |
| <b>G1a-radical</b>             | -719.536141          |
| <b>G2a</b>                     | -525.006698          |
| <b>G2a-radical</b>             | -524.377852          |
| <b>G2b</b>                     | -564.272011          |
| <b>G2b-radical</b>             | -563.645586          |
| <b>G2c</b>                     | -721.32973           |
| <b>G2c-radical</b>             | -720.704229          |
| <b>G3a</b>                     | -755.888323          |
| <b>G3a-radical</b>             | -755.269559          |
| <b>1c</b>                      | -795.154225          |
| <b>1c-radical</b>              | -794.535948          |
| <b>G3b</b>                     | -986.767331          |
| <b>G3b-radical</b>             | -986.15132           |

<sup>1</sup> Gaussian 09, Revision A.01, M. J. Frisch, G. W. Trucks, H. B. Schlegel, G. E. Scuseria, M. A. Robb, J. R. Cheeseman, G. Scalmani, V. Barone, B. Mennucci, G. A. Petersson, H. Nakatsuji, M. Caricato, X. Li, H. P. Hratchian, A. F. Izmaylov, J. Bloino, G. Zheng, J. L. Sonnenberg, M. Hada, M. Ehara, K. Toyota, R. Fukuda, J. Hasegawa, M. Ishida, T. Nakajima, Y. Honda, O. Kitao, H. Nakai, T. Vreven, J. A. Montgomery, Jr., J. E. Peralta, F. Ogliaro, M. Bearpark, J. J. Heyd, E. Brothers, K. N. Kudin, V. N. Staroverov, R. Kobayashi, J. Normand, K. Raghavachari, A. Rendell, J. C. Burant, S. S. Iyengar, J. Tomasi, M. Cossi, N. Rega, J. M. Millam, M. Klene, J. E. Knox, J. B. Cross, V. Bakken, C. Adamo, J. Jaramillo, R. Gomperts, R. E. Stratmann, O. Yazyev, A. J. Austin, R. Cammi, C. Pomelli, J. W. Ochterski, R. L. Martin, K. Morokuma, V. G. Zakrzewski, G. A. Voth, P. Salvador, J. J. Dannenberg, S. Dapprich, A. D. Daniels, Ö. Farkas, J. B. Foresman, J. V. Ortiz, J. Cioslowski, D. J. Fox, Gaussian, Inc., Wallingford CT, **2009**.

<sup>2</sup> (a) Zhao, Y.; Truhlar, D. G. *Theor. Chem. Acc.* **2008**, *120*, 215. (b) Zhao, Y.; Truhlar, D. G. *Acc. Chem. Res.* **2008**, *41*, 157.

### 3. Cartesian Coordinates

#### H<sub>a</sub> (radical)

|   |            |            |            |
|---|------------|------------|------------|
| H | 0.04964500 | 1.91489400 | 0.00000000 |
|---|------------|------------|------------|

#### 1m'

|   |             |             |             |
|---|-------------|-------------|-------------|
| C | -2.23058800 | -1.03005900 | 0.12409200  |
| C | -1.95026100 | -2.27735100 | -0.16531900 |
| H | -2.77688500 | -2.97257700 | -0.33633300 |
| C | -0.44964300 | -4.05563500 | 0.68608600  |
| H | 0.52837500  | -4.54273400 | 0.59219200  |
| H | -0.56771900 | -3.71401900 | 1.72018100  |
| H | -1.22231300 | -4.80724500 | 0.48590400  |
| C | 0.52326600  | -1.84558000 | 0.02684600  |
| H | 0.45818000  | -0.98418500 | -0.64772400 |
| H | 0.42240100  | -1.47779700 | 1.05425000  |
| H | 1.51760400  | -2.29344300 | -0.08230900 |
| C | -0.38057300 | -3.39062900 | -1.72872400 |
| H | 0.59522200  | -3.87761500 | -1.84464200 |
| H | -1.15638600 | -4.12261500 | -1.98273900 |
| H | -0.44344300 | -2.56599000 | -2.44706900 |
| C | -2.52658500 | 0.21464300  | 0.41962000  |
| C | -2.67007400 | 1.24870200  | -0.68695000 |
| C | -2.74719100 | 0.63195500  | 1.86243800  |
| C | -1.37888600 | 1.98041300  | -1.12832300 |
| H | -3.41999700 | 1.99524800  | -0.38732800 |
| H | -3.07433900 | 0.73510100  | -1.56539500 |
| H | -2.46532300 | -0.20337400 | 2.51338300  |
| H | -3.82025300 | 0.81276800  | 2.01887400  |
| C | -1.95983500 | 1.89111000  | 2.25547700  |
| C | -0.95839300 | 3.21083000  | -0.30656200 |
| H | -0.55635000 | 1.25362500  | -1.18135900 |
| H | -1.55275200 | 2.31686700  | -2.15755000 |
| C | -0.48045600 | 1.82041100  | 1.83234900  |
| H | -2.43948500 | 2.76657800  | 1.80169400  |
| H | -2.05146800 | 2.03355000  | 3.33798200  |
| C | -0.04350300 | 2.95508200  | 0.90049600  |
| H | -0.43136900 | 3.90844700  | -0.96925500 |
| H | -1.86522800 | 3.74324000  | 0.01002100  |
| H | -0.30186800 | 0.86529400  | 1.32316000  |
| H | 0.17219200  | 1.81788200  | 2.71288000  |
| H | 0.96815000  | 2.73248200  | 0.53556000  |
| H | 0.03537000  | 3.89041900  | 1.47139900  |
| C | -0.55855300 | -2.87664800 | -0.29244900 |

#### 1m'-radical

|   |             |             |             |
|---|-------------|-------------|-------------|
| C | -1.79093500 | -0.64400500 | 0.12437000  |
| C | -1.46009300 | -1.80726700 | -0.07703500 |
| C | -1.48562500 | -4.06357600 | 0.89238400  |
| H | -1.19554900 | -5.10740100 | 0.72444500  |
| H | -1.00072600 | -3.71063200 | 1.80801000  |
| H | -2.56942500 | -4.02280500 | 1.03907200  |
| C | 0.46143100  | -3.28517600 | -0.49313100 |
| H | 0.78331400  | -2.68181300 | -1.34767300 |
| H | 0.97702500  | -2.92032400 | 0.40072600  |
| H | 0.76104700  | -4.32532000 | -0.66849300 |
| C | -1.75909700 | -3.72628300 | -1.58398400 |
| H | -1.46629600 | -4.76678400 | -1.76810500 |
| H | -2.84747100 | -3.68459400 | -1.47661700 |
| H | -1.47605300 | -3.12615300 | -2.45435700 |
| C | -2.16281300 | 0.67730100  | 0.34749100  |
| C | -2.07423300 | 1.65894200  | -0.78913100 |
| C | -2.56613300 | 1.13095600  | 1.72445500  |
| C | -0.65866300 | 2.22357100  | -1.08030500 |
| H | -2.75830700 | 2.49946800  | -0.60395900 |
| H | -2.42529800 | 1.15687800  | -1.69893400 |
| H | -2.45905600 | 0.29118900  | 2.41996900  |
| H | -3.63038000 | 1.41441100  | 1.72696200  |
| C | -1.72727500 | 2.32428800  | 2.22004300  |
| C | -0.22614500 | 3.42400800  | -0.22257500 |
| H | 0.07563600  | 1.40940000  | -1.00644400 |
| H | -0.65632300 | 2.54473900  | -2.12882100 |
| C | -0.21470600 | 2.09494700  | 2.02603400  |
| H | -2.04327700 | 3.22724600  | 1.68404300  |
| H | -1.96645900 | 2.50559600  | 3.27377600  |
| C | 0.46958900  | 3.12127900  | 1.11335600  |
| H | 0.46766900  | 4.03801400  | -0.81031400 |
| H | -1.10325800 | 4.06348100  | -0.05432700 |
| H | -0.05626000 | 1.09235600  | 1.60809700  |
| H | 0.29965700  | 2.09956700  | 2.99397100  |
| H | 1.48907900  | 2.76901200  | 0.90704000  |
| H | 0.57867100  | 4.07130500  | 1.65432900  |
| C | -1.06534000 | -3.20609600 | -0.31318300 |

#### 1m

|   |             |             |             |
|---|-------------|-------------|-------------|
| C | -0.87174500 | -0.44498800 | 0.10214500  |
| C | -0.48094700 | -1.68480800 | -0.07272000 |
| H | -1.10162300 | -2.35077100 | -0.67784900 |



|    |             |             |             |   |             |             |             |
|----|-------------|-------------|-------------|---|-------------|-------------|-------------|
| Si | 1.12349100  | -2.30047700 | 0.69357200  | C | 2.69998400  | -1.92787500 | 2.10254600  |
| C  | 0.75845200  | -3.76543300 | 1.82119200  | H | 3.37131800  | -1.12043000 | 1.79228800  |
| H  | 1.68314000  | -4.16977500 | 2.24906400  | H | 2.30549400  | -1.67578700 | 3.09253300  |
| H  | 0.10299400  | -3.47074200 | 2.64782600  | H | 3.29189500  | -2.84598300 | 2.19615100  |
| H  | 0.26296800  | -4.57447800 | 1.27291200  | C | 2.00700300  | -2.56705000 | -0.83476400 |
| C  | 1.87960700  | -0.88798300 | 1.67692500  | H | 2.59008300  | -3.49463800 | -0.80171800 |
| H  | 2.08514300  | -0.02587500 | 1.03243100  | H | 1.20689700  | -2.69532600 | -1.57119700 |
| H  | 1.20045000  | -0.55425600 | 2.46942500  | H | 2.66463500  | -1.76597200 | -1.18838100 |
| H  | 2.82191300  | -1.19594600 | 2.14408900  | C | -1.01022700 | 1.63687500  | 0.58380200  |
| C  | 2.29378800  | -2.85032700 | -0.67708800 | C | -0.80483700 | 2.57001100  | -0.57935300 |
| H  | 3.23218400  | -3.23708900 | -0.26315800 | C | -2.04447100 | 1.93457600  | 1.63605700  |
| H  | 1.84473500  | -3.64421100 | -1.28465000 | C | -2.11903500 | 2.88972100  | -1.31614900 |
| H  | 2.53600000  | -2.01529400 | -1.34320100 | H | -0.09125700 | 2.11691300  | -1.27598600 |
| C  | -1.19302300 | 0.80874400  | 0.32513600  | H | -0.35286300 | 3.50843300  | -0.22236200 |
| C  | -0.69218300 | 1.90536600  | -0.59675400 | H | -2.20434800 | 3.02017300  | 1.69758700  |
| C  | -2.07219000 | 1.16522300  | 1.51314400  | H | -1.64242100 | 1.61469400  | 2.60453500  |
| C  | -1.80926600 | 2.83760100  | -1.09154700 | C | -3.41675600 | 1.23596900  | 1.44320900  |
| H  | -0.18939200 | 1.44091000  | -1.45269400 | C | -2.93346200 | 1.61964300  | -1.63325800 |
| H  | 0.06488400  | 2.49832900  | -0.06324200 | H | -2.71469400 | 3.57678800  | -0.70328800 |
| H  | -1.80198900 | 2.16954800  | 1.87044400  | H | -1.87731900 | 3.44164600  | -2.23100700 |
| H  | -1.83059700 | 0.47085000  | 2.32554200  | C | -4.40500700 | 1.94061100  | 0.49984900  |
| C  | -3.60172600 | 1.10291700  | 1.28628200  | H | -3.24952500 | 0.19737900  | 1.12579800  |
| C  | -3.03260800 | 2.06810500  | -1.62307800 | H | -3.88222300 | 1.18182200  | 2.43448500  |
| H  | -2.10964300 | 3.49759100  | -0.26888800 | C | -4.32690900 | 1.58605200  | -0.99316600 |
| H  | -1.39461000 | 3.49706400  | -1.86206700 | H | -3.05019900 | 1.50139200  | -2.71662200 |
| C  | -4.26111400 | 2.34031100  | 0.65414600  | H | -2.37020600 | 0.73959600  | -1.29735200 |
| H  | -3.83998100 | 0.20099100  | 0.70583800  | H | -4.30232900 | 3.02563500  | 0.63623100  |
| H  | -4.05516400 | 0.95797400  | 2.27429900  | H | -5.42481600 | 1.70556600  | 0.82897700  |
| C  | -4.33630900 | 2.38133400  | -0.87935800 | H | -4.99048400 | 2.27438900  | -1.53437400 |
| H  | -3.18196000 | 2.27291200  | -2.68933800 | H | -4.74624700 | 0.58166500  | -1.13821200 |
| H  | -2.83594200 | 0.99118300  | -1.54818000 |   |             |             |             |
| H  | -3.75320100 | 3.23735800  | 1.03310900  |   |             |             |             |
| H  | -5.29001500 | 2.41430400  | 1.02762900  |   |             |             |             |
| H  | -4.69331100 | 3.37797800  | -1.17305400 |   |             |             |             |
| H  | -5.10383600 | 1.67077600  | -1.21404000 |   |             |             |             |

### G1a

### 1m-radical

|    |             |             |            |    |             |             |             |
|----|-------------|-------------|------------|----|-------------|-------------|-------------|
| C  | -0.29406300 | 0.45538700  | 0.66766600 | C  | -1.17354200 | -0.34143200 | -1.68467400 |
| C  | 0.34229300  | -0.60079200 | 0.73996000 | C  | -1.81186600 | -1.11473900 | -2.53014900 |
| Si | 1.30468300  | -2.16208300 | 0.86158400 | H  | -2.34834600 | -1.98468000 | -2.14246800 |
| C  | 0.15952000  | -3.53794300 | 1.43902900 | Si | -1.80364200 | -0.73929100 | -4.37306100 |
| H  | 0.70860100  | -4.48172000 | 1.53686700 | C  | -0.93524600 | -2.13625400 | -5.29420900 |
| H  | -0.28164500 | -3.30025500 | 2.41275100 | H  | -0.93479600 | -1.95354800 | -6.37504100 |
| H  | -0.65806400 | -3.69340000 | 0.72737900 | H  | 0.10531800  | -2.23342900 | -4.96612000 |
|    |             |             |            | H  | -1.43283200 | -3.09647200 | -5.11781700 |
|    |             |             |            | C  | -0.89232800 | 0.88381400  | -4.63825000 |
|    |             |             |            | H  | -1.39493000 | 1.70431300  | -4.11366100 |
|    |             |             |            | H  | 0.13326300  | 0.82498200  | -4.25667000 |
|    |             |             |            | H  | -0.84581800 | 1.13856600  | -5.70299400 |

|   |             |             |             |
|---|-------------|-------------|-------------|
| C | -3.58054800 | -0.60421100 | -4.98636300 |
| H | -3.61051000 | -0.40426700 | -6.06370500 |
| H | -4.13239600 | -1.53331500 | -4.80419500 |
| H | -4.11213900 | 0.20638600  | -4.47648800 |
| C | -0.51460500 | 0.46830200  | -0.89148300 |
| C | -1.14367800 | 1.70555300  | -0.28447300 |
| C | 0.95202400  | 0.27082200  | -0.56657200 |
| C | -0.32354400 | 2.95031300  | -0.65269600 |
| H | -1.15329700 | 1.59771900  | 0.81114000  |
| H | -2.18247300 | 1.80703800  | -0.61334200 |
| C | 1.75045600  | 1.53142700  | -0.92794800 |
| H | 1.05356500  | 0.08431300  | 0.51372100  |
| H | 1.34490400  | -0.60704600 | -1.08857800 |
| C | 1.14806700  | 2.77531900  | -0.26926900 |
| H | -0.74505700 | 3.83416900  | -0.15926200 |
| H | -0.39812700 | 3.11763900  | -1.73629000 |
| H | 2.79769800  | 1.40872200  | -0.62686700 |
| H | 1.74043200  | 1.65924200  | -2.01937300 |
| H | 1.72089200  | 3.66664500  | -0.55018000 |
| H | 1.22726700  | 2.67913600  | 0.82391300  |

### G1a-radical

|    |             |             |             |
|----|-------------|-------------|-------------|
| C  | -0.58846100 | 0.38506800  | -2.34312900 |
| C  | -1.04518800 | -0.01989700 | -3.41807600 |
| Si | -1.72515600 | -0.64234900 | -5.00730300 |
| C  | -1.47600700 | -2.50590900 | -5.09097300 |
| H  | -1.87083600 | -2.90644200 | -6.03204700 |
| H  | -0.41307700 | -2.76257800 | -5.03234900 |
| H  | -1.98974500 | -3.00913300 | -4.26526500 |
| C  | -0.81293900 | 0.18703600  | -6.42873100 |
| H  | -0.93727200 | 1.27439000  | -6.39591300 |
| H  | 0.25932500  | -0.03133900 | -6.38608900 |
| H  | -1.19390700 | -0.17085400 | -7.39232500 |
| C  | -3.55889300 | -0.23243000 | -5.08080500 |
| H  | -3.99640200 | -0.59198800 | -6.01933400 |
| H  | -4.09940600 | -0.70275000 | -4.25267100 |
| H  | -3.72390700 | 0.84839600  | -5.02091000 |
| C  | -0.08412900 | 0.83667500  | -1.14186700 |
| C  | -0.98635600 | 1.26576200  | -0.01749500 |
| C  | 1.39464000  | 0.90362500  | -0.87481200 |
| C  | -0.56607400 | 2.64308900  | 0.52238800  |
| H  | -0.90517200 | 0.53193100  | 0.80226700  |
| H  | -2.03020400 | 1.27165200  | -0.34399100 |
| C  | 1.78746100  | 2.28474800  | -0.32341700 |

|   |             |            |             |
|---|-------------|------------|-------------|
| H | 1.65269100  | 0.14271400 | -0.11852100 |
| H | 1.95966300  | 0.66394500 | -1.78007900 |
| C | 0.92173700  | 2.66266000 | 0.88051000  |
| H | -1.17514200 | 2.89919700 | 1.39694900  |
| H | -0.76527600 | 3.40309200 | -0.24517200 |
| H | 2.84868800  | 2.28412200 | -0.04891400 |
| H | 1.65775100  | 3.03539500 | -1.11454600 |
| H | 1.20721700  | 3.65290300 | 1.25388900  |
| H | 1.10688800  | 1.94968700 | 1.69777200  |

### G2a

|    |             |             |             |
|----|-------------|-------------|-------------|
| C  | -1.33159000 | 0.13008800  | 0.08634000  |
| C  | -0.23088800 | 0.34170800  | -0.58795000 |
| H  | 0.04875800  | -0.38316500 | -1.35591500 |
| C  | -2.42649600 | -0.04221900 | 0.78483800  |
| H  | -2.41614300 | -0.60555300 | 1.71355900  |
| H  | -3.37570600 | 0.36458200  | 0.44766000  |
| Si | 0.85460600  | 1.84641100  | -0.26352300 |
| C  | 0.09284300  | 2.84695800  | 1.13128400  |
| H  | 0.69140000  | 3.74111500  | 1.33857400  |
| H  | -0.92270900 | 3.16955900  | 0.87764000  |
| H  | 0.03335400  | 2.25786300  | 2.05288600  |
| C  | 0.95425000  | 2.87239100  | -1.83975200 |
| H  | 1.58774700  | 3.75493600  | -1.69285900 |
| H  | 1.38044900  | 2.28987200  | -2.66427800 |
| H  | -0.03823000 | 3.21613500  | -2.14989800 |
| C  | 2.57986100  | 1.25642100  | 0.20773300  |
| H  | 3.02418200  | 0.65427200  | -0.59277800 |
| H  | 3.24682300  | 2.10589100  | 0.39509300  |
| H  | 2.55256000  | 0.64182000  | 1.11377900  |

### G2a-radical

|    |             |             |             |
|----|-------------|-------------|-------------|
| C  | -1.61743300 | 0.22293600  | 0.00048600  |
| C  | -0.64679100 | 0.98817900  | -0.02727600 |
| C  | -2.69551200 | -0.62778200 | 0.03132500  |
| H  | -3.08513100 | -0.99635200 | 0.97296900  |
| H  | -3.17685500 | -0.94724300 | -0.88564600 |
| Si | 0.80684700  | 2.11982400  | -0.06875900 |
| C  | 0.72667300  | 3.25047600  | 1.43083700  |
| H  | 1.58417700  | 3.93312700  | 1.44375900  |
| H  | -0.18714300 | 3.85336600  | 1.42262800  |
| H  | 0.74040300  | 2.67116100  | 2.35987300  |
| C  | 0.73789800  | 3.12369500  | -1.65623400 |
| H  | 1.59612800  | 3.80266500  | -1.71922500 |

|                    |             |             |             |            |             |             |             |
|--------------------|-------------|-------------|-------------|------------|-------------|-------------|-------------|
| H                  | 0.75566100  | 2.47172100  | -2.53563600 | H          | 0.09855300  | 3.79367400  | -1.84009100 |
| H                  | -0.17530500 | 3.72608400  | -1.70108300 | C          | 2.29737300  | 0.99016300  | 0.06106300  |
| C                  | 2.37325700  | 1.07984600  | -0.01874800 | H          | 2.28052500  | 0.25528900  | -0.75058000 |
| H                  | 2.42497500  | 0.40561500  | -0.87991600 | H          | 3.25298900  | 1.52551000  | 0.01536400  |
| H                  | 3.26166800  | 1.72170000  | -0.03522500 | H          | 2.25849800  | 0.44521700  | 1.01000000  |
| H                  | 2.41123700  | 0.47032300  | 0.88997100  | C          | -3.59050700 | -0.52422300 | 1.40272300  |
|                    |             |             |             | H          | -4.58417400 | -0.07186100 | 1.51619400  |
| <b>G2b</b>         |             |             |             | H          | -3.73215500 | -1.61188500 | 1.42997500  |
| C                  | -1.58214500 | 0.40675800  | -0.10471300 | H          | -2.97991000 | -0.23255400 | 2.25990700  |
| C                  | -0.39759800 | 0.46616500  | -0.66156100 |            |             |             |             |
| H                  | -0.10734600 | -0.33480200 | -1.34611300 | <b>G2c</b> |             |             |             |
| C                  | -2.75229600 | 0.38647300  | 0.48569800  | C          | -1.20639800 | 0.05436600  | 0.33794700  |
| H                  | -3.59048100 | 0.86944900  | -0.01610300 | C          | 0.09269200  | 0.05222200  | 0.51745100  |
| Si                 | 0.78931800  | 1.88116300  | -0.29986600 | H          | 0.58411400  | -0.88767100 | 0.78203400  |
| C                  | -0.01406000 | 3.02833300  | 0.95298600  | C          | -2.50334700 | 0.12389800  | 0.14869100  |
| H                  | 0.65154700  | 3.86284900  | 1.20072700  | Si         | 1.09248200  | 1.63415000  | 0.32727100  |
| H                  | -0.94937000 | 3.44417400  | 0.56304500  | C          | 2.05516800  | 1.95163200  | 1.91581700  |
| H                  | -0.24974900 | 2.49488500  | 1.88049200  | H          | 2.66257700  | 2.86038400  | 1.83320100  |
| C                  | 1.15666300  | 2.80333700  | -1.90119500 | H          | 1.37759400  | 2.07368800  | 2.76778300  |
| H                  | 1.87546800  | 3.61318000  | -1.73137500 | H          | 2.73046100  | 1.11871200  | 2.14198500  |
| H                  | 1.58311800  | 2.13095400  | -2.65407900 | C          | -0.10396900 | 3.04531800  | -0.00747700 |
| H                  | 0.24458800  | 3.24103400  | -2.32079900 | H          | 0.43198500  | 3.98665400  | -0.17272400 |
| C                  | 2.39345100  | 1.16870500  | 0.38632900  | H          | -0.71489300 | 2.84026700  | -0.89395300 |
| H                  | 2.84035700  | 0.45686800  | -0.31690300 | H          | -0.78528700 | 3.18688700  | 0.83902500  |
| H                  | 3.12783800  | 1.96130500  | 0.57033100  | C          | 2.30631300  | 1.44400400  | -1.10163600 |
| H                  | 2.21941700  | 0.64209600  | 1.33074000  | H          | 1.77989300  | 1.26628500  | -2.04548100 |
| C                  | -3.01824100 | -0.26855000 | 1.81852000  | H          | 2.91738200  | 2.34666800  | -1.21838700 |
| H                  | -3.39857100 | 0.46241400  | 2.54053300  | H          | 2.98532200  | 0.60065200  | -0.93258800 |
| H                  | -3.77203700 | -1.05751300 | 1.72146400  | C          | -3.44329600 | 0.44536200  | 1.29300400  |
| H                  | -2.10523900 | -0.71152600 | 2.22385800  | H          | -4.16973100 | -0.37450900 | 1.40078300  |
|                    |             |             |             | H          | -2.87405600 | 0.49311900  | 2.22858800  |
| <b>G2b-radical</b> |             |             |             | C          | -3.11264100 | -0.09222500 | -1.21860500 |
| C                  | -1.77556400 | 0.61004700  | 0.05336000  | H          | -3.92841000 | -0.82370500 | -1.16112600 |
| C                  | -0.71812200 | 1.24787400  | -0.00299600 | H          | -3.53566500 | 0.84004600  | -1.61121700 |
| C                  | -2.95368300 | -0.09981100 | 0.11602100  | H          | -2.36963800 | -0.45595400 | -1.93193300 |
| H                  | -3.44844600 | -0.35918700 | -0.81632000 | C          | -4.20395200 | 1.76083600  | 1.09187500  |
| Si                 | 0.85856700  | 2.19267200  | -0.08708800 | H          | -3.47995800 | 2.56895900  | 0.91498500  |
| C                  | 0.89637200  | 3.42152600  | 1.33556600  | H          | -4.82825700 | 1.69849700  | 0.18994200  |
| H                  | 1.83058000  | 3.99481100  | 1.32747500  | C          | -5.08829100 | 2.11629500  | 2.28602300  |
| H                  | 0.06352200  | 4.12907500  | 1.26731100  | H          | -4.46672800 | 2.18073200  | 3.18911100  |
| H                  | 0.82285600  | 2.90728300  | 2.29959500  | H          | -5.80427500 | 1.30187700  | 2.46127500  |
| C                  | 0.93217900  | 3.09145100  | -1.73611300 | C          | -5.84135400 | 3.42979500  | 2.08520000  |
| H                  | 1.86675400  | 3.65747800  | -1.82439700 | H          | -6.46591200 | 3.67292000  | 2.95043700  |
| H                  | 0.88391800  | 2.38461900  | -2.57103200 | H          | -5.14239200 | 4.25976500  | 1.93169000  |

|                    |             |             |             |                    |             |             |             |
|--------------------|-------------|-------------|-------------|--------------------|-------------|-------------|-------------|
| H                  | -6.49228300 | 3.37717800  | 1.20516000  | C                  | 0.06167500  | 2.75589500  | 1.15757400  |
|                    |             |             |             | H                  | 0.68094100  | 3.60975800  | 1.45407200  |
| <b>G2c-radical</b> |             |             |             | H                  | -0.93322400 | 3.13272100  | 0.89665600  |
| C                  | -1.50852600 | 1.04092800  | 0.01792100  | H                  | -0.05162300 | 2.09895800  | 2.02752100  |
| C                  | -0.34369200 | 1.44491200  | -0.06566300 | C                  | 0.94096800  | 2.92956400  | -1.81114400 |
| C                  | -2.80867600 | 0.58362400  | 0.11624600  | H                  | 1.56209400  | 3.81162400  | -1.61685200 |
| Si                 | 1.38276300  | 2.05979500  | -0.20286300 | H                  | 1.38379900  | 2.38922700  | -2.65527500 |
| C                  | 1.76982400  | 3.11382000  | 1.30637400  | H                  | -0.05178100 | 3.27596500  | -2.11714900 |
| H                  | 2.79563300  | 3.49702900  | 1.25573300  | C                  | 2.55829900  | 1.21994000  | 0.17104500  |
| H                  | 1.09070200  | 3.97019200  | 1.37283100  | H                  | 3.00135100  | 0.63810600  | -0.64493100 |
| H                  | 1.67068600  | 2.53240800  | 2.22904800  | H                  | 3.22960500  | 2.05976600  | 0.38462200  |
| C                  | 1.53045800  | 3.08826000  | -1.77063600 | H                  | 2.52517400  | 0.58082200  | 1.06014300  |
| H                  | 2.55276500  | 3.46424200  | -1.89339300 | C                  | -2.36081000 | -0.83390700 | 2.07422500  |
| H                  | 1.27889200  | 2.49403900  | -2.65534300 | C                  | -3.55325400 | -1.00295400 | 2.78734900  |
| H                  | 0.85360500  | 3.94847800  | -1.73967000 | C                  | -1.17973100 | -1.37182800 | 2.60538600  |
| C                  | 2.55743800  | 0.59213200  | -0.28126000 | C                  | -3.56891400 | -1.69151200 | 3.99851100  |
| H                  | 2.33295200  | -0.04503800 | -1.14308600 | H                  | -4.47620300 | -0.59007500 | 2.38663800  |
| H                  | 3.59540700  | 0.93334400  | -0.37136200 | C                  | -1.19554400 | -2.05939700 | 3.81324700  |
| H                  | 2.47900600  | -0.02254000 | 0.62156600  | H                  | -0.24656500 | -1.24753200 | 2.06032400  |
| C                  | -3.50593000 | 0.54081800  | 1.44758300  | C                  | -2.39048200 | -2.22344400 | 4.51693700  |
| H                  | -3.96771200 | -0.44985100 | 1.58030000  | H                  | -4.50524000 | -1.81228300 | 4.53606400  |
| H                  | -2.77407600 | 0.66890100  | 2.25272200  | H                  | -0.27101900 | -2.47003700 | 4.20949100  |
| C                  | -3.58388600 | 0.21576400  | -1.11598700 | H                  | -2.40067400 | -2.76183200 | 5.45997900  |
| H                  | -4.21323600 | -0.66282600 | -0.92711400 |                    |             |             |             |
| H                  | -4.25461900 | 1.03193300  | -1.42096000 | <b>G3a-radical</b> |             |             |             |
| H                  | -2.92010300 | 0.00136600  | -1.95682100 | C                  | -1.52726200 | 0.14753000  | 0.06370500  |
| C                  | -4.60087600 | 1.61201900  | 1.57900700  | C                  | -0.58360000 | 0.93405400  | -0.00136200 |
| H                  | -4.15105300 | 2.60225700  | 1.42468200  | C                  | -2.59345300 | -0.74170900 | 0.14704400  |
| H                  | -5.34593100 | 1.47714000  | 0.78270900  | H                  | -2.99684800 | -1.14122600 | -0.78001800 |
| C                  | -5.30123500 | 1.56990600  | 2.93605300  | Si                 | 0.83664300  | 2.10732700  | -0.08268700 |
| H                  | -4.55487400 | 1.69980000  | 3.73085300  | C                  | 0.81586700  | 3.16091000  | 1.47455700  |
| H                  | -5.74201400 | 0.57493900  | 3.08440600  | H                  | 1.65158200  | 3.87012400  | 1.47195100  |
| C                  | -6.38478900 | 2.63823900  | 3.06765700  | H                  | -0.11484700 | 3.73286700  | 1.54899900  |
| H                  | -6.87614500 | 2.59364900  | 4.04464500  | H                  | 0.90286800  | 2.53887500  | 2.37172600  |
| H                  | -5.95995000 | 3.64132900  | 2.95033900  | C                  | 0.63998200  | 3.18272300  | -1.61046400 |
| H                  | -7.15486400 | 2.51098700  | 2.29853600  | H                  | 1.47049100  | 3.89368700  | -1.68980400 |
|                    |             |             |             | H                  | 0.62677300  | 2.57421300  | -2.52063400 |
| <b>G3a</b>         |             |             |             | H                  | -0.29340600 | 3.75374000  | -1.57287200 |
| C                  | -1.32180400 | 0.09864400  | 0.03321400  | C                  | 2.42916400  | 1.11295400  | -0.18033400 |
| C                  | -0.24349000 | 0.33416400  | -0.66545200 | H                  | 2.44651100  | 0.48633700  | -1.07796000 |
| H                  | 0.03587800  | -0.36792400 | -1.45529900 | H                  | 3.29883100  | 1.77936500  | -0.21362300 |
| C                  | -2.37620900 | -0.09317400 | 0.79744700  | H                  | 2.53642100  | 0.45732600  | 0.69010000  |
| H                  | -3.33153300 | 0.32080600  | 0.47669600  | C                  | -3.18948700 | -1.16370100 | 1.38357900  |
| Si                 | 0.83723600  | 1.83490200  | -0.28301500 | C                  | -4.26544900 | -2.07754100 | 1.36811500  |

|   |             |             |            |
|---|-------------|-------------|------------|
| C | -2.73042800 | -0.69080200 | 2.63274100 |
| C | -4.85575500 | -2.50095300 | 2.55026300 |
| H | -4.62896700 | -2.44912600 | 0.41300500 |
| C | -3.32570800 | -1.11833600 | 3.81029700 |
| H | -1.90282300 | 0.01312300  | 2.65654600 |
| C | -4.38965000 | -2.02461300 | 3.77836300 |
| H | -5.68286000 | -3.20433600 | 2.51833800 |
| H | -2.96059600 | -0.74523400 | 4.76289500 |
| H | -4.85155900 | -2.35698200 | 4.70322500 |

### 1c

|    |             |             |             |
|----|-------------|-------------|-------------|
| C  | -1.34695000 | 0.07961500  | 0.01722600  |
| C  | -0.25223000 | 0.29630200  | -0.66374500 |
| H  | 0.03546000  | -0.40961400 | -1.44733700 |
| C  | -2.42941200 | -0.06233100 | 0.75622600  |
| Si | 0.82095900  | 1.79596600  | -0.26200300 |
| C  | 0.01016700  | 2.71248400  | 1.16349700  |
| H  | 0.61115300  | 3.57688000  | 1.46709100  |
| H  | -0.98600800 | 3.07293800  | 0.88337700  |
| H  | -0.10873400 | 2.05685800  | 2.03372900  |
| C  | 0.94971500  | 2.89785500  | -1.78370000 |
| H  | 1.56194800  | 3.78249400  | -1.57344700 |
| H  | 1.41176400  | 2.36383000  | -2.62150100 |
| H  | -0.03872300 | 3.24046900  | -2.10770600 |
| C  | 2.53860700  | 1.19512600  | 0.22480000  |
| H  | 3.00215600  | 0.61964200  | -0.58427900 |
| H  | 3.19813300  | 2.04036800  | 0.45324800  |
| H  | 2.49443600  | 0.55313700  | 1.11137300  |
| C  | -2.38667100 | -0.80466200 | 2.04371900  |
| C  | -3.55180600 | -0.99099100 | 2.79768200  |
| C  | -1.18349700 | -1.32739500 | 2.54562500  |
| C  | -3.51779600 | -1.67685400 | 4.01209700  |
| H  | -4.49988800 | -0.60059900 | 2.44105300  |
| C  | -1.15010100 | -2.01070000 | 3.75431600  |
| H  | -0.26763700 | -1.19420300 | 1.97461900  |
| C  | -2.31919300 | -2.19012500 | 4.49706600  |
| H  | -4.43638900 | -1.80814300 | 4.57729100  |
| H  | -0.20677800 | -2.40580700 | 4.12106300  |
| H  | -2.29228700 | -2.72491600 | 5.44187400  |
| C  | -3.73543100 | 0.54787600  | 0.29580400  |
| H  | -4.50115100 | -0.22246200 | 0.14857400  |
| H  | -4.11522200 | 1.25999100  | 1.03788000  |
| H  | -3.59718800 | 1.07583900  | -0.64980200 |

### 1c-radical

|    |             |             |             |
|----|-------------|-------------|-------------|
| C  | -1.72481900 | 0.52754000  | 0.00538700  |
| C  | -0.68428000 | 1.18308700  | -0.00897700 |
| C  | -2.90822000 | -0.21248200 | 0.02830800  |
| Si | 0.86778500  | 2.17352000  | -0.07215300 |
| C  | 0.74600700  | 3.56652900  | 1.18386200  |
| H  | 1.65689900  | 4.17603000  | 1.17433200  |
| H  | -0.10375700 | 4.22099800  | 0.96369900  |
| H  | 0.61363300  | 3.17066900  | 2.19615900  |
| C  | 1.04566300  | 2.86601100  | -1.81122900 |
| H  | 1.95196000  | 3.47716200  | -1.89304400 |
| H  | 1.11365900  | 2.06008100  | -2.54968700 |
| H  | 0.18814700  | 3.49423600  | -2.07397800 |
| C  | 2.32053100  | 1.05234000  | 0.33870300  |
| H  | 2.39862800  | 0.23001300  | -0.37989300 |
| H  | 3.26068400  | 1.61556200  | 0.31428200  |
| H  | 2.21136800  | 0.61746900  | 1.33761800  |
| C  | -3.40292400 | -0.73870100 | 1.34789400  |
| H  | -4.40104000 | -0.34580300 | 1.58056100  |
| H  | -3.47795300 | -1.83360800 | 1.33433200  |
| H  | -2.72609000 | -0.45196300 | 2.15416000  |
| C  | -3.64077900 | -0.46027900 | -1.19536300 |
| C  | -4.84286500 | -1.20026300 | -1.18532300 |
| C  | -3.17846100 | 0.03191600  | -2.43669000 |
| C  | -5.54685900 | -1.43336900 | -2.36067500 |
| H  | -5.22843200 | -1.59455900 | -0.25016100 |
| C  | -3.88583400 | -0.20530400 | -3.60540400 |
| H  | -2.25592800 | 0.60485500  | -2.46412200 |
| C  | -5.07533400 | -0.93889700 | -3.57723100 |
| H  | -6.46943600 | -2.00596300 | -2.32789600 |
| H  | -3.51018700 | 0.18353600  | -4.54761600 |
| H  | -5.62700600 | -1.12367700 | -4.49410800 |

### G3b

|    |             |             |             |
|----|-------------|-------------|-------------|
| C  | -1.41604600 | -0.03853800 | 0.05470600  |
| C  | -0.34581200 | 0.10848600  | -0.67891500 |
| H  | -0.10986500 | -0.64035500 | -1.43930800 |
| C  | -2.47342500 | -0.08340500 | 0.84536100  |
| Si | 0.75018300  | 1.62614100  | -0.42211700 |
| C  | -0.11576400 | 2.75436600  | 0.80404900  |
| H  | 0.46072200  | 3.67243900  | 0.96472900  |
| H  | -1.10995500 | 3.03614400  | 0.43907600  |
| H  | -0.24906900 | 2.26548600  | 1.77570900  |
| C  | 0.97711600  | 2.48586000  | -2.08143300 |

|   |             |             |             |   |             |             |             |
|---|-------------|-------------|-------------|---|-------------|-------------|-------------|
| H | 1.63320000  | 3.35854600  | -1.98496800 | H | 2.35391100  | 0.53405100  | -0.74667800 |
| H | 1.42575300  | 1.81086600  | -2.81888100 | H | 3.10620100  | 1.93908700  | 0.03227000  |
| H | 0.01567800  | 2.82796000  | -2.47909700 | H | 2.31346900  | 0.69555900  | 1.01601100  |
| C | 2.42301300  | 1.07056400  | 0.24208500  | C | -3.20227800 | -1.25223000 | 1.33438500  |
| H | 2.91246900  | 0.37492900  | -0.44855800 | C | -4.53479700 | -1.66409100 | 1.53365400  |
| H | 3.09221000  | 1.92673600  | 0.38574600  | C | -2.32205300 | -1.30168200 | 2.43268700  |
| H | 2.31302400  | 0.56281700  | 1.20664800  | C | -4.95879300 | -2.12528200 | 2.77458200  |
| C | -2.39627200 | -0.75798800 | 2.17234600  | H | -5.24599600 | -1.58839100 | 0.71651800  |
| C | -3.52931800 | -1.36599100 | 2.72769700  | C | -2.74863900 | -1.77077300 | 3.66864100  |
| C | -1.18745500 | -0.82441400 | 2.87712000  | H | -1.29421100 | -0.97696100 | 2.29677600  |
| C | -3.45325100 | -2.02575100 | 3.95199900  | C | -4.06824000 | -2.18909000 | 3.84660800  |
| H | -4.47333200 | -1.32782800 | 2.19066600  | H | -5.99384500 | -2.42681400 | 2.90846700  |
| C | -1.11102400 | -1.48554700 | 4.09903100  | H | -2.04836400 | -1.81195300 | 4.49805700  |
| H | -0.30210600 | -0.35298300 | 2.45652500  | H | -4.40208400 | -2.55314900 | 4.81371200  |
| C | -2.24474900 | -2.08862100 | 4.64342900  | C | -3.34185500 | -1.13121300 | -1.23253800 |
| H | -4.34203900 | -2.49517400 | 4.36426800  | C | -3.93513400 | -2.39751100 | -1.40537200 |
| H | -0.16469300 | -1.52462400 | 4.63131000  | C | -3.28696100 | -0.26755900 | -2.34369600 |
| H | -2.18609300 | -2.60110300 | 5.59923400  | C | -4.46865800 | -2.77161600 | -2.63308700 |
| C | -3.74189700 | 0.56275200  | 0.39906600  | H | -3.94434700 | -3.10074000 | -0.57801200 |
| C | -4.16640200 | 0.47004900  | -0.93104000 | C | -3.82898000 | -0.64301300 | -3.56629400 |
| C | -4.50889900 | 1.31235200  | 1.30078200  | H | -2.82241100 | 0.70793900  | -2.22852300 |
| C | -5.32552400 | 1.11655200  | -1.35369600 | C | -4.42684900 | -1.89534400 | -3.71786400 |
| H | -3.58125300 | -0.12038500 | -1.63152700 | H | -4.91025200 | -3.75756300 | -2.74715300 |
| C | -5.66792900 | 1.95763100  | 0.87824400  | H | -3.78632600 | 0.04454300  | -4.40623400 |
| H | -4.18639800 | 1.39397200  | 2.33584500  | H | -4.84740300 | -2.18942400 | -4.67502700 |
| C | -6.08133300 | 1.86197600  | -0.45040000 |   |             |             |             |
| H | -5.64281800 | 1.03088800  | -2.38920500 |   |             |             |             |
| H | -6.24831500 | 2.54013600  | 1.58830900  |   |             |             |             |
| H | -6.98786600 | 2.36275300  | -0.77785000 |   |             |             |             |

### G3b-radical

|    |             |             |             |
|----|-------------|-------------|-------------|
| C  | -1.68548400 | 0.18269300  | 0.02773100  |
| C  | -0.75747400 | 0.98704900  | 0.00829300  |
| C  | -2.74587500 | -0.73471900 | 0.04417000  |
| Si | 0.63338000  | 2.19654700  | -0.04938000 |
| C  | 0.45737900  | 3.38526600  | 1.39501700  |
| H  | 1.27326100  | 4.11735400  | 1.39381600  |
| H  | -0.49006700 | 3.93132800  | 1.34179200  |
| H  | 0.48384800  | 2.85002700  | 2.34996400  |
| C  | 0.53156300  | 3.11725800  | -1.68466900 |
| H  | 1.34699200  | 3.84428400  | -1.77266200 |
| H  | 0.60304700  | 2.42369300  | -2.52914200 |
| H  | -0.41609300 | 3.65920100  | -1.77142300 |
| C  | 2.25366700  | 1.25133600  | 0.07439000  |
